# Supplementary material for: A secondary-sphere proton channel accelerating metal–hydride formation in Mn(i) catalysts for selective CO2-to-formate conversion
Source: Royal Society of Chemistry journal article supplement (doi:10.1039/d5sc09412g), 2026-03-19
Supplement: d5sc09412g1.xlsx [file d5sc09412g1.xlsx]

## Sheet: Mn-bpyDiOMe_HCOO
Structure name	spin multiplicity	Charge			Structure name	spin multiplicity	Charge			Structure name	spin multiplicity	Charge			Structure name	spin multiplicity	Charge			Structure name	spin multiplicity	Charge			Structure name	spin multiplicity	Charge			Structure name	spin multiplicity	Charge			Structure name	spin multiplicity	Charge			Structure name	spin multiplicity	Charge			Structure name	spin multiplicity	Charge
Mn_I_Br_0_1	1	0			Mn_0_Br_-1_2	2	-1			Mn_0_Br_-1_2_ dissociated	2	-1			Mn_0_Br_-2_1_ dissociated	1	-2			Mn_0_0_2	2	0			MnL•−_0_-1_1	1	-1			IRC_TS-1a	1	-1			TS-1a	1	-1			Mn_I_H_0_1	1	0			TS-2a	1	0
Atom number	x	y	z		Atom number	x	y	z		Atom number	x	y	z		Atom number	x	y	z		Atom number	x	y	z		Atom number	x	y	z		Atom number	x	y	z		Atom number	x	y	z		Atom number	x	y	z		Atom number	x	y	z
35	-1.37816	-3.66838	4.95244		35	-1.42541	-3.60537	5.05511		35	4.62969	-7.48467	5.35489		35	4.89045	-7.7578	5.28479		25	-1.70896	-3.83293	2.57502		25	-1.73111	-3.86062	2.38759		25	-1.51556	-3.56993	3.77382		25	-1.55629	-3.72276	3.37917		25	-1.74118	-3.82099	2.51999		25	-1.71207	-3.81727	2.53004
25	-1.83457	-3.75121	2.36668		25	-1.82757	-3.76281	2.36019		25	-1.8573	-3.74276	2.46013		25	-1.8382	-3.76987	2.09174		8	-0.356993	1.09029	1.30061		8	-0.3783	1.10168	1.36269		8	-0.038319	0.451819	0.490841		8	0.018689	0.456122	0.423164		8	-0.345576	1.1322	1.55899		8	-0.320871	1.12765	1.50153
8	-0.348376	1.0502	1.40467		8	-0.36274	1.04795	1.37296		8	-0.361007	1.01668	1.01966		8	-0.386862	1.06187	1.179		8	-4.06326	-8.97366	2.81368		8	-4.11641	-8.94889	2.95087		8	-3.62838	-8.26069	2.06865		8	-3.59374	-8.35989	1.98976		8	-4.03816	-8.964	2.91926		8	-4.0468	-8.94678	2.92036
8	-4.22574	-8.67907	3.30683		8	-4.29446	-8.66776	3.32298		8	-4.34079	-8.8277	2.49435		8	-4.41113	-8.75208	2.68933		8	-2.00011	-1.22226	3.93462		8	-2.11888	-1.24078	3.69072		8	-1.29012	-1.17826	5.47166		8	-1.29502	-1.68549	5.47941		8	-2.38515	-1.09491	3.41944		8	-2.39016	-1.06672	3.34572
8	-2.65623	-0.925445	2.71108		8	-2.65758	-0.939075	2.6833		8	-2.18791	-1.09275	3.73256		8	-2.54139	-1.04	2.95692		8	-3.17817	-3.17006	0.064172		8	-2.96246	-3.28864	-0.243479		8	-3.10573	-2.37875	1.61535		8	-2.98327	-2.14874	1.37118		8	-2.61027	-3.56764	-0.327965		8	-2.57144	-3.60771	-0.314653
8	-2.34155	-3.8284	-0.542321		8	-2.29729	-3.88797	-0.53892		8	-3.2031	-3.1052	-0.125775		8	-2.87471	-3.5629	-0.650634		8	-4.09345	-4.52051	4.18377		8	-4.21605	-4.47209	3.8579		8	-3.9713	-3.94071	5.36533		8	-4.28153	-3.94489	4.46362		8	-4.35391	-4.44594	3.72149		8	-4.3465	-4.41504	3.71313
8	-4.6666	-4.14272	3.13974		8	-4.65369	-4.14064	3.15384		8	-4.31354	-4.3893	3.97653		8	-4.31357	-4.30303	3.60002		7	0.340288	-3.54291	2.19567		7	0.308657	-3.55055	2.21513		7	0.479852	-3.30038	3.31167		7	0.520603	-3.40792	3.07723		7	0.341925	-3.52279	2.19317		7	0.356953	-3.52559	2.17563
7	0.270214	-3.51569	2.10618		7	0.252395	-3.50677	2.12884		7	0.214038	-3.50761	2.20527		7	0.186081	-3.49667	2.17965		7	-1.00805	-5.81284	2.47422		7	-1.02475	-5.79905	2.49684		7	-0.833081	-5.51499	3.78547		7	-0.794188	-5.66937	3.64959		7	-1.00695	-5.82133	2.44003		7	-1.00121	-5.81352	2.4415
7	-1.16338	-5.77775	2.41327		7	-1.1823	-5.77027	2.44632		7	-1.18981	-5.73488	2.42184		7	-1.1959	-5.69973	2.38345		6	1.00439	-2.4302	1.80554		6	0.999676	-2.42788	1.83828		6	1.11928	-2.14167	2.94347		6	1.15062	-2.23815	2.78503		6	1.01231	-2.41126	1.82003		6	1.02876	-2.41575	1.79667
6	0.98644	-2.42908	1.74582		6	0.987829	-2.43541	1.74305		6	0.919652	-2.41783	1.82856		6	0.9419	-2.39544	1.83597		6	2.39893	-2.33332	1.93071		6	2.38003	-2.32407	1.96726		6	2.50538	-2.03021	2.96448		6	2.5416	-2.11228	2.87824		6	2.41213	-2.32964	1.92397		6	2.42751	-2.33669	1.90378
6	2.3815	-2.38166	1.90658		6	2.37617	-2.3821	1.8849		6	2.30143	-2.33515	2.04958		6	2.30742	-2.32548	2.07585		6	3.15971	-3.37487	2.47008		6	3.16327	-3.3882	2.49116		6	3.33495	-3.11626	3.32841		6	3.35242	-3.18409	3.27455		6	3.17229	-3.3909	2.41627		6	3.18444	-3.3976	2.40336
6	3.09021	-3.45404	2.4477		6	3.09321	-3.46395	2.46428		6	3.00407	-3.36213	2.6872		6	3.02465	-3.38327	2.68431		6	2.45298	-4.54146	2.79687		6	2.47111	-4.55363	2.77153		6	2.67611	-4.31153	3.58757		6	2.6833	-4.38006	3.54675		6	2.45559	-4.556	2.72689		6	2.46674	-4.56115	2.71482
6	2.32895	-4.59289	2.74688		6	2.34671	-4.58353	2.77982		6	2.25987	-4.51119	3.00138		6	2.2787	-4.52825	2.93202		6	1.0699	-4.61201	2.6216		6	1.06754	-4.65189	2.59507		6	1.26911	-4.39999	3.55463		6	1.28919	-4.47354	3.43668		6	1.06807	-4.60624	2.58316		6	1.07984	-4.60892	2.57104
6	0.947836	-4.60973	2.54938		6	0.93886	-4.63764	2.56862		6	0.893029	-4.57219	2.71901		6	0.897785	-4.59301	2.64495		6	0.314416	-5.87744	2.78081		6	0.339635	-5.87891	2.74775		6	0.544394	-5.63617	3.7552		6	0.568303	-5.73535	3.67898		6	0.313496	-5.87243	2.74814		6	0.320656	-5.87147	2.74117
6	0.157189	-5.85513	2.71616		6	0.179538	-5.83953	2.72651		6	0.102112	-5.82212	2.84771		6	0.127212	-5.81006	2.77003		6	0.941698	-7.08023	3.12889		6	0.962934	-7.10925	3.09213		6	1.20429	-6.88075	3.85002		6	1.26556	-6.94063	3.86058		6	0.947799	-7.06528	3.11612		6	0.950871	-7.06824	3.10145
6	0.770254	-7.06163	3.07476		6	0.782295	-7.08269	3.08855		6	0.660624	-7.03	3.27365		6	0.677805	-7.03285	3.21505		6	0.232264	-8.28484	3.10606		6	0.26149	-8.29886	3.09956		6	0.499291	-8.07017	3.92174		6	0.589055	-8.14973	3.98533		6	0.246604	-8.27543	3.11924		6	0.242312	-8.2735	3.10773
6	0.048194	-8.25872	3.08073		6	0.073123	-8.26548	3.07053		6	-0.078564	-8.2223	3.20327		6	-0.062524	-8.20814	3.2114		6	-1.10007	-8.20322	2.67632		6	-1.10045	-8.21041	2.68833		6	-0.912373	-7.93665	3.87924		6	-0.813465	-8.06601	3.92592		6	-1.08144	-8.20922	2.68316		6	-1.08891	-8.19994	2.68089
6	-1.28537	-8.16325	2.6713		6	-1.28409	-8.17356	2.64579		6	-1.35859	-8.11838	2.65034		6	-1.36997	-8.09604	2.68189		6	-1.69996	-6.97682	2.37366		6	-1.70029	-6.99451	2.40183		6	-1.54282	-6.70534	3.81531		6	-1.47717	-6.85195	3.76684		6	-1.68693	-6.98951	2.3534		6	-1.69029	-6.97789	2.35676
6	-1.87061	-6.93215	2.34995		6	-1.86765	-6.94211	2.36043		6	-1.8971	-6.87875	2.27661		6	-1.90286	-6.87707	2.28232		6	4.67998	-3.29707	2.67712		6	4.68727	-3.29403	2.6953		6	4.86931	-3.02217	3.4051		6	4.88182	-3.09056	3.40112		6	4.69918	-3.34113	2.5783		6	4.70991	-3.3464	2.57544
6	4.60885	-3.44353	2.67521		6	4.61744	-3.43465	2.6903		6	4.50129	-3.26813	3.01972		6	4.5228	-3.29981	3.02638		6	0.850986	-9.63878	3.48463		6	0.87011	-9.65781	3.47627		6	1.15971	-9.45657	3.96077		6	1.29868	-9.50683	4.09823		6	0.870913	-9.61605	3.53541		6	0.860884	-9.61837	3.51742
6	5.25894	-4.51394	1.76514		6	5.28957	-4.4725	1.75939		6	5.25489	-4.45464	2.37331		6	5.2916	-4.43595	2.3116		6	0.255712	-1.28186	1.17199		6	0.265449	-1.26685	1.19547		6	0.277997	-0.976801	2.47357		6	0.335522	-1.04056	2.35622		6	0.290631	-1.21966	1.23613		6	0.310477	-1.22755	1.20235
6	5.23042	-2.07391	2.34855		6	5.22008	-2.0492	2.38905		6	5.12356	-1.95725	2.5052		6	5.13719	-1.9554	2.59263		6	0.400886	0.064051	1.90894		6	0.381464	0.063716	1.95817		6	0.924785	-0.104117	1.38313		6	0.983767	-0.179223	1.25368		6	0.386841	0.053899	2.10148		6	0.410796	0.054799	2.05459
6	4.90172	-3.77699	4.15735		6	4.93564	-3.78936	4.16143		6	4.66542	-3.3213	4.55806		6	4.70296	-3.44429	4.55649		6	-3.12552	-6.95986	1.86702		6	-3.13311	-7.00612	1.9008		6	-3.05366	-6.62404	3.76493		6	-2.99019	-6.80992	3.72729		6	-3.1102	-7.01576	1.83894		6	-3.11536	-6.99704	1.84716
6	0.656151	-9.61417	3.47063		6	0.671465	-9.62966	3.44766		6	0.512571	-9.55474	3.68987		6	0.522499	-9.53675	3.72387		6	-4.17959	-7.56357	2.79707		6	-4.18825	-7.53574	2.87222		6	-3.82902	-7.88921	3.43167		6	-3.74225	-8.0849	3.37906		6	-4.1623	-7.55964	2.80897		6	-4.16679	-7.54187	2.81759
6	0.562802	-10.5737	2.26023		6	0.584613	-10.5809	2.23009		6	-0.45484	-10.7296	3.45543		6	-0.475581	-10.6999	3.56736		6	-1.87078	-2.24066	3.38091		6	-1.95204	-2.27163	3.15271		6	-1.37505	-2.15026	4.8146		6	-1.38336	-2.54948	4.68955		6	-2.11285	-2.14364	3.00489		6	-2.09859	-2.12064	2.96903
6	2.13196	-9.49009	3.88925		6	2.14569	-9.52382	3.87713		6	1.82958	-9.84703	2.93239		6	1.80312	-9.88829	2.93057		6	-2.5787	-3.44796	1.02196		6	-2.43359	-3.54465	0.771507		6	-2.40874	-2.91594	2.40806		6	-2.31216	-2.84866	2.06581		6	-2.2375	-3.69006	0.760849		6	-2.22024	-3.70299	0.781008
6	-0.1478	-10.1992	4.65638		6	-0.137066	-10.2327	4.62163		6	0.800642	-9.4474	5.20681		6	0.87236	-9.39578	5.22459		6	-3.15384	-4.27352	3.53847		6	-3.23373	-4.25826	3.25131		6	-3.00451	-3.85948	4.70615		6	-3.20081	-3.9454	4.01642		6	-3.34132	-4.2352	3.1958		6	-3.32887	-4.21837	3.19966
6	0.329052	-1.21632	1.13222		6	0.326346	-1.22408	1.11687		6	0.230791	-1.28325	1.10705		6	0.305763	-1.22246	1.11897		6	4.989	-3.4988	4.17985		6	5.03623	-3.63402	4.16318		6	5.34005	-3.44731	4.81577		6	5.29919	-3.45817	4.84437		6	5.06485	-3.67494	4.04375		6	5.06373	-3.67867	4.04432
6	0.341591	0.007423	2.05362		6	0.331657	0.006131	2.02585		6	0.35358	0.077617	1.79465		6	0.284643	0.071377	1.93325		1	4.51039	-2.71615	4.7905		1	4.5532	-2.92735	4.85795		1	4.91172	-2.78978	5.58994		1	4.84931	-2.76632	5.57489		1	4.61932	-2.94548	4.73945		1	4.60801	-2.95147	4.73578
6	-0.448888	2.22295	2.18024		6	-0.465984	2.2211	2.1446		6	-0.321465	2.32341	1.54479		6	-0.496707	2.29539	1.84693		1	4.63994	-4.47794	4.54333		1	4.7135	-4.65095	4.43539		1	5.04805	-4.48283	5.04974		1	4.99688	-4.48235	5.1125		1	4.72285	-4.67971	4.33633		1	4.72375	-4.68502	4.33368
6	-3.31371	-6.95032	1.89888		6	-3.32093	-6.95746	1.92631		6	-3.2737	-6.83197	1.65098		6	-3.2849	-6.87629	1.65601		1	6.0769	-3.44622	4.3485		1	6.12636	-3.57484	4.32082		1	6.43885	-3.38487	4.8852		1	6.39505	-3.3952	4.94494		1	6.15907	-3.64358	4.17101		1	6.15655	-3.64213	4.18145
6	-4.32704	-7.30577	2.99283		6	-4.3291	-7.28401	3.03239		6	-4.4184	-7.41521	2.48097		6	-4.43926	-7.34246	2.54361		6	5.36492	-4.41391	1.85396		6	5.39545	-4.30101	1.75771		6	5.49224	-3.96898	2.35167		6	5.52945	-4.0853	2.40801		6	5.33958	-4.38701	1.634		6	5.35785	-4.3926	1.63679
6	-5.09244	-9.08444	4.3429		6	-5.17417	-9.04448	4.35607		6	-5.36547	-9.43754	3.24629		6	-5.4295	-9.24596	3.52631		1	5.15027	-4.301	0.778878		1	5.16591	-4.08446	0.701406		1	5.17564	-3.6893	1.33347		1	5.2471	-3.8473	1.36956		1	5.08897	-4.17537	0.5819		1	5.1159	-4.18124	0.582622
6	-2.27786	-2.00201	2.55033		6	-2.27022	-2.01767	2.53056		6	-2.04209	-2.12798	3.21507		6	-2.21922	-2.10884	2.58423		1	6.45726	-4.36291	1.9916		1	6.48967	-4.24435	1.8873		1	6.59312	-3.91579	2.3933		1	6.62796	-4.03169	2.48409		1	6.43681	-4.361	1.73602		1	6.45414	-4.3663	1.74797
6	-2.14791	-3.79573	0.593987		6	-2.12388	-3.83044	0.603654		6	-2.64703	-3.37434	0.860704		6	-2.39736	-3.68627	0.419462		1	5.03496	-5.41701	2.16561		1	5.08485	-5.33687	1.96652		1	5.19951	-5.01687	2.52263		1	5.22858	-5.1244	2.61389		1	5.00486	-5.40997	1.86648		1	5.02134	-5.41548	1.8669
6	-3.5595	-4.04983	2.83164		6	-3.54668	-4.05644	2.82935		6	-3.34533	-4.15438	3.36982		6	-3.32695	-4.10784	2.98547		6	5.25368	-1.93906	2.23494		6	5.22464	-1.88358	2.38777		6	5.37488	-1.59279	3.13602		6	5.4021	-1.67617	3.08736		6	5.26976	-1.95339	2.23514		6	5.2817	-1.95834	2.23568
1	-0.092556	-9.53794	5.53632		1	-0.077983	-9.58664	5.51305		1	1.5446	-8.66704	5.42879		1	1.63484	-8.62026	5.39558		1	5.0901	-1.75406	1.1614		1	5.06266	-1.6013	1.33536		1	5.11467	-1.24775	2.12273		1	5.16777	-1.37091	2.05517		1	5.0832	-1.6793	1.18472		1	5.10302	-1.68509	1.18369
1	-1.20939	-10.3406	4.40145		1	-1.20037	-10.3566	4.36411		1	-0.120073	-9.22329	5.76984		1	-0.022284	-9.13792	5.81508		1	4.81177	-1.10305	2.79997		1	4.75027	-1.11826	3.02277		1	4.96474	-0.870082	3.85965		1	4.98223	-0.922682	3.77273		1	4.84447	-1.16578	2.87736		1	4.85085	-1.17076	2.87423
1	0.2652	-11.1809	4.93976		1	0.262682	-11.2245	4.89214		1	1.20266	-10.4045	5.57815		1	1.27458	-10.3465	5.61425		1	6.34031	-1.92464	2.41337		1	6.30976	-1.8499	2.57667		1	6.47272	-1.56609	3.22392		1	6.49751	-1.65456	3.19975		1	6.3603	-1.95738	2.38831		1	6.371	-1.96134	2.39726
1	0.996059	-11.552	2.52484		1	0.999775	-11.57	2.48694		1	0.006296	-11.6605	3.82082		1	-0.023313	-11.6288	3.95002		6	2.31364	-9.5009	3.94325		6	2.34454	-9.53718	3.90106		6	2.68847	-9.36108	4.11662		6	2.81861	-9.34974	4.28766		6	2.33608	-9.4613	3.98032		6	2.32803	-9.4724	3.95844
1	-0.47992	-10.7408	1.94905		1	-0.455457	-10.7286	1.90044		1	-1.4057	-10.5942	3.99459		1	-1.40433	-10.5229	4.13274		1	2.95858	-9.09723	3.14673		1	2.97501	-9.14476	3.08724		1	3.15676	-8.84215	3.26531		1	3.29359	-8.85367	3.4266		1	2.97443	-9.07739	3.16879		1	2.96623	-9.09085	3.14573
1	1.11922	-10.1758	1.39616		1	1.15784	-10.1817	1.37712		1	-0.682478	-10.8671	2.38633		1	-0.74569	-10.8702	2.51289		1	2.40684	-8.84842	4.82606		1	2.4646	-8.87596	4.77417		1	2.97228	-8.82984	5.03943		1	3.06041	-8.77187	5.19425		1	2.43349	-8.78509	4.84465		1	2.43129	-8.79802	4.82349
1	2.76156	-9.10826	3.06997		1	2.78143	-9.13217	3.06707		1	1.65997	-9.89049	1.84418		1	1.58763	-9.97809	1.85313		1	2.70706	-10.4921	4.21788		1	2.73615	-10.5297	4.17603		1	3.1213	-10.3731	4.1648		1	3.28091	-10.3441	4.39013		1	2.73451	-10.4435	4.27928		1	2.72169	-10.4572	4.2547
1	2.25689	-8.82563	4.75902		1	2.26931	-8.86908	4.75448		1	2.60085	-9.08905	3.13541		1	2.58956	-9.12985	3.06286		6	0.803427	-10.5759	2.25421		6	0.787503	-10.6133	2.26163		6	0.850049	-10.1941	2.63457		6	1.04367	-10.2911	2.78729		6	0.817636	-10.592	2.33606		6	0.798351	-10.5896	2.31469
1	2.51808	-10.4825	4.16948		1	2.52765	-10.5214	4.14732		1	2.23298	-10.8212	3.25378		1	2.21302	-10.8519	3.27747		1	1.23892	-11.5551	2.51198		1	1.20769	-11.5999	2.52006		1	1.30641	-11.1982	2.63777		1	1.56105	-11.2642	2.81817		1	1.25866	-11.561	2.62128		1	1.23537	-11.5618	2.59528
1	1.8239	-7.06665	3.33615		1	1.83388	-7.08458	3.36404		1	1.68284	-7.04443	3.6502		1	1.71135	-7.04434	3.56097		1	-0.228177	-10.7464	1.90946		1	-0.252383	-10.7671	1.93371		1	-0.23387	-10.3176	2.48122		1	-0.029637	-10.4833	2.6314		1	-0.215694	-10.7774	2.00453		1	-0.23707	-10.7686	1.98616
1	-3.41368	-7.70835	1.10393		1	-3.4447	-7.72505	1.14383		1	-3.23715	-7.39551	0.701194		1	-3.26904	-7.54332	0.774863		1	1.38046	-10.1556	1.41456		1	1.35738	-10.2131	1.40692		1	1.2552	-9.63414	1.77603		1	1.41905	-9.72668	1.9181		1	1.38671	-10.1964	1.47914		1	1.36661	-10.194	1.45727
1	-3.59088	-5.99371	1.44526		1	-3.59491	-6.00399	1.46287		1	-3.5167	-5.79522	1.39308		1	-3.50833	-5.86977	1.28789		6	0.027623	-10.2605	4.63798		6	0.070283	-10.2652	4.65392		6	0.599463	-10.2755	5.14683		6	0.735806	-10.3009	5.29895		6	0.055348	-10.2013	4.71319		6	0.045364	-10.2026	4.69581
1	-4.15744	-6.69232	3.89914		1	-4.11271	-6.69705	3.94677		1	-4.3979	-7.01699	3.51382		1	-4.39634	-6.853	3.53467		1	0.043941	-9.61296	5.52975		1	0.123773	-9.61558	5.54311		1	0.812093	-9.7771	6.10692		1	0.903455	-9.75961	6.24441		1	0.078769	-9.52664	5.58446		1	0.073657	-9.5299	5.56841
1	-5.34708	-7.07033	2.62752		1	-5.34677	-6.99526	2.69776		1	-5.38049	-7.0964	2.0308		1	-5.39979	-7.03922	2.07725		1	-1.02323	-10.4202	4.35127		1	-0.992096	-10.4009	4.39793		1	-0.489797	-10.4177	5.07192		1	-0.344003	-10.4911	5.2014		1	-0.997839	-10.3675	4.43873		1	-1.00908	-10.3642	4.42353
1	-4.88147	-8.5468	5.28825		1	-4.93097	-8.5371	5.31103		1	-5.33776	-9.12576	4.30909		1	-5.35566	-8.83649	4.55374		1	0.453063	-11.2381	4.91718		1	0.479685	-11.2523	4.92727		1	1.06442	-11.275	5.17139		1	1.24014	-11.2782	5.37184		1	0.481391	-11.1705	5.01969		1	0.468327	-11.1742	4.99899
1	-6.15435	-8.9098	4.07952		1	-6.2281	-8.80877	4.10557		1	-6.36829	-9.19087	2.84431		1	-6.43767	-8.99958	3.13589		1	-4.07947	-7.15644	3.82164		1	-4.05822	-7.08885	3.87638		1	-3.53977	-8.73018	4.08742		1	-3.40037	-8.95289	3.97137		1	-4.06274	-7.08545	3.80435		1	-4.06307	-7.07308	3.8153
1	-4.94092	-10.1616	4.5065		1	-5.08133	-10.1313	4.50074		1	-5.22124	-10.5268	3.19275		1	-5.32921	-10.3407	3.57485		1	-5.18518	-7.2733	2.43032		1	-5.19554	-7.23594	2.51552		1	-4.90672	-7.70656	3.60497		1	-4.81424	-7.94273	3.61514		1	-5.16994	-7.2983	2.42671		1	-5.17404	-7.2749	2.4384
1	0.547771	2.63322	2.43824		1	0.529421	2.6344	2.40456		1	0.715547	2.70927	1.6117		1	0.496158	2.72139	2.09718		1	-3.15846	-7.52834	0.920453		1	-3.18267	-7.64049	0.997636		1	-3.32648	-5.82965	3.05069		1	-3.28802	-6.03897	3.00486		1	-3.13464	-7.65611	0.939661		1	-3.14379	-7.63356	0.9454
1	-0.996125	2.97222	1.58901		1	-1.01342	2.96984	1.55229		1	-0.897336	2.97568	0.871235		1	-1.0212	2.9975	1.18097		1	-3.41143	-5.92981	1.6261		1	-3.41273	-5.99398	1.58898		1	-3.43007	-6.27375	4.73883		1	-3.35744	-6.46006	4.70657		1	-3.40862	-6.01383	1.51398		1	-3.41404	-5.99472	1.52416
1	-1.00003	2.04342	3.12453		1	-1.0179	2.04428	3.08944		1	-0.769513	2.37474	2.55718		1	-1.07342	2.20436	2.78939		1	1.99376	-7.07079	3.40015		1	2.02236	-7.09715	3.33901		1	2.29097	-6.8911	3.82678		1	2.35094	-6.92523	3.86158		1	1.99842	-7.04515	3.39101		1	2.00325	-7.05398	3.36956
1	1.38556	0.310104	2.27473		1	1.37343	0.316539	2.24543		1	1.41624	0.383038	1.87997		1	1.31839	0.40454	2.16044		1	-1.71699	-9.09568	2.578		1	-1.71356	-9.10582	2.59033		1	-1.53061	-8.83313	3.88174		1	-1.40835	-8.97538	3.99411		1	-1.69373	-9.1064	2.60046		1	-1.70619	-9.09381	2.60023
1	-0.132582	-0.232639	3.02539		1	-0.143095	-0.227883	2.99888		1	-0.054707	0.031128	2.82258		1	-0.226731	-0.088169	2.90095		1	1.46551	0.36225	1.97271		1	1.44082	0.375292	2.04516		1	1.58482	-0.711443	0.745765		1	1.57623	-0.813001	0.576595		1	1.44691	0.341616	2.24429		1	1.47162	0.341763	2.19214
1	0.880659	-0.954091	0.214063		1	0.873867	-0.963706	0.195573		1	0.678928	-1.19441	0.101348		1	0.877584	-1.02328	0.195446		1	0.02086	-0.036159	2.9364		1	-0.015162	-0.062215	2.9763		1	1.53362	0.712684	1.81366		1	1.66231	0.585741	1.67497		1	-0.039585	-0.143538	3.09585		1	-0.012874	-0.131051	3.05256
1	-0.700674	-1.43391	0.829102		1	-0.70386	-1.44596	0.816781		1	-0.830606	-1.5186	0.968684		1	-0.717047	-1.47875	0.820515		1	0.643918	-1.16723	0.1446		1	0.680225	-1.1304	0.181093		1	-0.654087	-1.38379	2.06067		1	-0.630463	-1.39034	1.98101		1	0.744318	-1.01368	0.251889		1	0.764387	-1.033	0.215958
1	2.89456	-1.47508	1.58784		1	2.88956	-1.48619	1.5389		1	2.81646	-1.43831	1.70862		1	2.82301	-1.41823	1.76077		1	-0.80932	-1.52792	1.09125		1	-0.795609	-1.51403	1.08087		1	-0.02846	-0.358482	3.33392		1	0.10396	-0.428496	3.24565		1	-0.76524	-1.45283	1.06023		1	-0.746246	-1.45664	1.02591
1	2.8257	-5.48354	3.12401		1	2.84412	-5.46321	3.18585		1	2.7523	-5.37059	3.45531		1	2.76476	-5.41107	3.34723		1	2.87631	-1.41617	1.58812		1	2.85251	-1.40115	1.63256		1	2.94773	-1.07323	2.69253		1	2.98491	-1.14553	2.6461		1	2.88924	-1.40673	1.59636		1	2.90756	-1.41643	1.5733
1	6.31292	-2.10689	2.54779		1	6.30216	-2.0625	2.59681		1	6.1932	-1.93472	2.76611		1	6.20593	-1.9343	2.85992		1	2.98932	-5.41095	3.17222		1	3.01164	-5.43199	3.12388		1	3.25142	-5.20284	3.83417		1	3.25265	-5.25231	3.86044		1	2.98964	-5.44126	3.0658		1	2.99823	-5.44576	3.0592
1	5.09601	-1.80143	1.28984		1	5.08924	-1.76343	1.33341		1	5.04558	-1.86675	1.40984		1	5.06295	-1.8014	1.50408		6	0.241351	1.68524	0.168791		6	0.223134	1.71378	0.243796		6	-0.883302	1.44699	1.04518		6	-0.699374	1.51831	1.02851		1	-1.32313	-3.92082	4.06866		1	-1.24689	-3.91093	4.11738
1	4.7999	-1.27138	2.96843		1	4.76782	-1.26249	3.01393		1	4.65244	-1.07086	2.95872		1	4.65254	-1.10134	3.0921		1	0.366477	0.976305	-0.67167		1	0.349664	1.02032	-0.609605		1	-0.286429	2.2615	1.49562		1	-0.007937	2.28369	1.42749		6	0.293911	1.82075	0.505095		6	0.320025	1.8071	0.44223
1	5.98995	-3.77587	4.33069		1	6.02535	-3.77094	4.33094		1	5.73133	-3.22548	4.82326		1	5.76957	-3.36082	4.82654		1	-0.417422	2.50114	-0.164465		1	-0.431605	2.53798	-0.078202		1	-1.48871	1.85842	0.224796		1	-1.32867	1.97519	0.251312		1	0.44716	1.18757	-0.389469		1	0.474507	1.16595	-0.446389
1	4.44781	-3.03026	4.82877		1	4.47154	-3.06612	4.85201		1	4.11809	-2.49609	5.04224		1	4.15309	-2.65461	5.09457		1	1.23599	2.10909	0.410384		1	1.21911	2.13164	0.493073		1	-1.56114	1.03693	1.81486		1	-1.35024	1.16741	1.84936		1	-0.351188	2.66584	0.221522		1	-0.325105	2.64935	0.15056
1	4.51943	-4.76953	4.44112		1	4.57336	-4.79384	4.42888		1	4.3038	-4.27338	4.97544		1	4.34598	-4.42101	4.91779		6	-4.97874	-9.60032	3.68383		6	-5.03536	-9.50449	3.86127		6	-4.10639	-9.55943	1.75371		6	-4.08283	-9.63282	1.60124		1	1.28016	2.21714	0.817703		1	1.30559	2.2064	0.752931
1	6.35127	-4.51536	1.91206		1	6.38428	-4.46094	1.89655		1	6.33361	-4.36605	2.58223		1	6.3698	-4.36469	2.53389		1	-4.81614	-10.6864	3.62028		1	-4.91327	-10.598	3.84287		1	-3.9646	-9.70974	0.674028		1	-3.97531	-9.7081	0.509784		6	-4.94115	-9.53546	3.83913		6	-4.95495	-9.52112	3.83377
1	4.888	-5.52573	1.99159		1	4.93319	-5.49347	1.96831		1	4.9228	-5.42494	2.77222		1	4.95363	-5.43064	2.63953		1	-4.83369	-9.27858	4.734		1	-4.86153	-9.14513	4.89539		1	-3.54293	-10.3326	2.30708		1	-3.50502	-10.4442	2.081		1	-4.77314	-10.6226	3.84612		1	-4.78993	-10.6087	3.8347
1	5.05685	-4.30469	0.702257		1	5.07673	-4.24886	0.701065		1	5.1196	-4.46015	1.27938		1	5.16471	-4.37159	1.21833		1	-6.02717	-9.38022	3.40076		1	-6.08221	-9.26042	3.58936		1	-5.18068	-9.66471	1.99454		1	-5.14952	-9.75544	1.86743		1	-4.78677	-9.14408	4.86405		1	-4.80293	-9.13597	4.86131
1	-1.91766	-9.04729	2.60298		1	-1.90779	-9.06176	2.55769		1	-1.98995	-8.99239	2.51048		1	-2.00918	-8.96929	2.5741												7	-1.30598	-5.02741	-0.225687		7	-1.52111	-4.75298	-0.03984		1	-5.99375	-9.33982	3.55357		1	-6.00574	-9.32056	3.54523
																														6	-1.56891	-3.76462	-1.007		6	-1.73165	-3.63603	-1.00303							6	-0.822341	-3.93803	5.7114
																														1	-2.50423	-3.34174	-0.623251		1	-2.68626	-3.15442	-0.764986							8	0.250108	-4.44595	5.68628
																														1	-1.70216	-4.05546	-2.05929		1	-1.7909	-4.05177	-2.02659							8	-1.75428	-3.43981	6.24982
																														6	-2.41262	-6.0384	-0.397486		6	-2.55554	-5.8035	-0.191782
																														1	-2.18994	-6.86391	0.289337		1	-2.33488	-6.59216	0.538896
																														1	-2.35677	-6.40935	-1.43138		1	-2.48469	-6.25431	-1.19927
																														6	0.040051	-5.62761	-0.551813		6	-0.14464	-5.30891	-0.209901
																														1	0.803206	-4.8935	-0.265821		1	0.558311	-4.62614	0.287572
																														1	0.069819	-5.76588	-1.64329		1	0.100407	-5.3131	-1.2882
																														6	-0.483988	-2.69884	-0.832764		6	-0.645729	-2.55898	-0.910993
																														1	0.42084	-2.96316	-1.4125		1	0.26264	-2.87947	-1.45679
																														1	-0.191793	-2.67372	0.232205		1	-0.358133	-2.45427	0.145754
																														6	0.339791	-6.93363	0.193475		6	0.110515	-6.71586	0.340713
																														1	-0.255483	-7.77058	-0.207907		1	-0.422951	-7.47712	-0.254107
																														1	0.079577	-6.81447	1.25648		1	-0.243808	-6.79722	1.37519
																														6	-3.82059	-5.52915	-0.059463		6	-4.00145	-5.36803	0.070477
																														1	-4.21324	-4.88619	-0.862146		1	-4.38953	-4.74221	-0.748646
																														1	-3.7814	-4.91894	0.862995		1	-4.0516	-4.76451	0.995571
																														8	-1.02052	-1.47042	-1.26086		8	-1.13682	-1.34072	-1.4278
																														8	1.72209	-7.2164	0.135019		8	1.50269	-6.97998	0.367239
																														8	-4.68612	-6.63121	0.065537		8	-4.82317	-6.51588	0.143579
																														1	-0.68569	-0.759163	-0.673031		1	-0.764896	-0.625727	-0.873212
																														1	1.92797	-7.56702	-0.744588		1	1.81117	-7.08471	-0.545399
																														1	-4.37516	-7.16178	0.831174		1	-4.45897	-7.09918	0.840157
																														1	-1.29632	-4.75753	0.778883		1	-1.68279	-4.18509	1.26475
[truncated: 20 more columns]

## Sheet: Mn-bpyDiOMe_CO
Structure name	spin multiplicity	Charge			Structure name	spin multiplicity	Charge			Structure name	spin multiplicity	Charge			Structure name	spin multiplicity	Charge			Structure name	spin multiplicity	Charge			Structure name	spin multiplicity	Charge			Structure name	spin multiplicity	Charge			Structure name	spin multiplicity	Charge
Mn_0_0_2	2	0			MnL•−_0_-1_1	1	-1			TS-1b	1	-1			Mn_I_CO2_-1_1	1	-1			Mn_I_CO2H_0_1	1	0			Mn_0_CO2H_-1_2	2	-1			TS-2b	2	0			Mn_0_CO_0_2	2	0
Atom number	x	y	z		Atom number	x	y	z		Atom number	x	y	z		Atom number	x	y	z		Atom number	x	y	z		Atom number	x	y	z		Atom number	x	y	z		Atom number	x	y	z
25	-1.70896	-3.83293	2.57502		25	-1.73111	-3.86062	2.38759		25	-1.6832	-3.88938	2.19122		25	-1.73102	-3.86968	2.36236		25	-1.76484	-3.85362	2.2955		25	-1.77	-3.83812	2.34275		25	-1.48068	-4.72522	3.04497		25	-1.70642	-3.8491	2.56632
8	-0.356993	1.09029	1.30061		8	-0.3783	1.10168	1.36269		8	-0.358036	1.13049	2.07613		8	-0.328522	1.1533	1.94918		8	-0.411527	1.08691	2.1744		8	-0.42797	1.07825	2.12203		8	-0.488572	0.079786	4.3049		8	-0.329638	1.11229	1.55762
8	-4.06326	-8.97366	2.81368		8	-4.11641	-8.94889	2.95087		8	-4.0615	-8.58096	3.51898		8	-4.00559	-8.60348	3.5691		8	-3.98119	-8.77517	3.35136		8	-4.05642	-8.80687	3.32679		8	-3.07394	-10.0061	3.175		8	-4.00734	-8.97014	2.94275
8	-2.00011	-1.22226	3.93462		8	-2.11888	-1.24078	3.69072		8	-2.22825	-1.42448	3.72052		8	-2.37611	-1.23825	3.51472		8	-2.77741	-1.11206	2.68404		8	-2.81094	-1.09096	2.56827		8	-2.72408	-2.25641	4.0895		8	-2.46463	-1.07574	3.25001
8	-3.17817	-3.17006	0.064172		8	-2.96246	-3.28864	-0.243479		8	-2.19014	-3.02351	-0.574106		8	-2.15969	-3.32591	-0.519877		8	-2.06598	-3.87222	-0.684015		8	-2.09467	-4.01861	-0.622733		8	-2.44113	-4.221	0.258588		8	-2.53338	-3.63158	-0.286439
8	-4.09345	-4.52051	4.18377		8	-4.21605	-4.47209	3.8579		8	-4.58451	-4.20056	2.59516		8	-4.63305	-4.19758	2.72811		8	-4.62252	-4.32877	2.84236		8	-4.59435	-4.32887	3.01781		8	-4.05325	-5.68925	4.12282		8	-4.43304	-4.43973	3.54429
7	0.340288	-3.54291	2.19567		7	0.308657	-3.55055	2.21513		7	0.373285	-3.55274	2.17242		7	0.358938	-3.53503	2.21391		7	0.357209	-3.52911	2.13304		7	0.343649	-3.5131	2.13478		7	0.472645	-4.06543	2.45949		7	0.363804	-3.52822	2.20815
7	-1.00805	-5.81284	2.47422		7	-1.02475	-5.79905	2.49684		7	-0.97712	-5.81474	2.4047		7	-0.997063	-5.83897	2.41467		7	-0.998443	-5.86399	2.33418		7	-1.03286	-5.84789	2.39862		7	-0.655989	-6.55419	2.31728		7	-0.988322	-5.84235	2.45236
6	1.00439	-2.4302	1.80554		6	0.999676	-2.42788	1.83828		6	1.05466	-2.39973	1.8918		6	1.03308	-2.3997	1.9084		6	1.03716	-2.39886	1.8421		6	1.04578	-2.40867	1.80455		6	1.00317	-2.82161	2.35421		6	1.03937	-2.42688	1.81046
6	2.39893	-2.33332	1.93071		6	2.38003	-2.32407	1.96726		6	2.44382	-2.32155	1.98105		6	2.4297	-2.32321	2.00491		6	2.43853	-2.33433	1.93827		6	2.4435	-2.33928	1.88679		6	2.35051	-2.59697	2.05899		6	2.43679	-2.34957	1.90453
6	3.15971	-3.37487	2.47008		6	3.16327	-3.3882	2.49116		6	3.22815	-3.42546	2.37158		6	3.19704	-3.41944	2.4141		6	3.19542	-3.43135	2.34546		6	3.19756	-3.44367	2.36133		6	3.2502	-3.67961	1.87225		6	3.19508	-3.41331	2.40947
6	2.45298	-4.54146	2.79687		6	2.47111	-4.55363	2.77153		6	2.52422	-4.5981	2.6178		6	2.48317	-4.59326	2.66725		6	2.46779	-4.60098	2.60331		6	2.47766	-4.58374	2.66486		6	2.69808	-4.94285	1.9502		6	2.47836	-4.56553	2.74616
6	1.0699	-4.61201	2.6216		6	1.06754	-4.65189	2.59507		6	1.12054	-4.65709	2.4978		6	1.08695	-4.63389	2.5513		6	1.07723	-4.63132	2.47668		6	1.05799	-4.64832	2.51797		6	1.31108	-5.15434	2.21128		6	1.08238	-4.61343	2.62543
6	0.314416	-5.87744	2.78081		6	0.339635	-5.87891	2.74775		6	0.378083	-5.89702	2.64795		6	0.337445	-5.89707	2.68347		6	0.324145	-5.90112	2.63492		6	0.329584	-5.86724	2.6854		6	0.727711	-6.45961	2.18809		6	0.333037	-5.87693	2.78586
6	0.941698	-7.08023	3.12889		6	0.962934	-7.10925	3.09213		6	1.01641	-7.10607	2.99938		6	0.988546	-7.10012	3.00204		6	0.971395	-7.08467	3.01341		6	0.968929	-7.09208	3.06322		6	1.51522	-7.641	2.01202		6	0.978338	-7.08073	3.12136
6	0.232264	-8.28484	3.10606		6	0.26149	-8.29886	3.09956		6	0.322719	-8.3055	3.05313		6	0.302517	-8.31318	3.00847		6	0.284568	-8.30144	3.04158		6	0.299399	-8.29734	3.04017		6	0.937517	-8.88041	1.84238		6	0.293356	-8.29402	3.08599
6	-1.10007	-8.20322	2.67632		6	-1.10045	-8.21041	2.68833		6	-1.0354	-8.22426	2.66853		6	-1.04613	-8.24075	2.629		6	-1.04848	-8.25003	2.62429		6	-1.05448	-8.25357	2.6007		6	-0.487047	-8.90755	1.8133		6	-1.03769	-8.2358	2.63918
6	-1.69996	-6.97682	2.37366		6	-1.70029	-6.99451	2.40183		6	-1.64764	-7.02046	2.3518		6	-1.66718	-7.02416	2.3425		6	-1.66847	-7.04072	2.28558		6	-1.67641	-7.03628	2.31644		6	-1.23345	-7.7599	2.0679		6	-1.65223	-7.01877	2.33213
6	4.67998	-3.29707	2.67712		6	4.68727	-3.29403	2.6953		6	4.76135	-3.37687	2.4956		6	4.72794	-3.38206	2.55173		6	4.72492	-3.40945	2.4831		6	4.73238	-3.41233	2.50505		6	4.75091	-3.48448	1.58068		6	4.72478	-3.36797	2.55608
6	0.850986	-9.63878	3.48463		6	0.87011	-9.65781	3.47627		6	0.945657	-9.64908	3.45912		6	0.947626	-9.65945	3.37147		6	0.923248	-9.62957	3.47406		6	0.935214	-9.63895	3.4381		6	1.73697	-10.1827	1.68365		6	0.926797	-9.6378	3.47725
6	0.255712	-1.28186	1.17199		6	0.265449	-1.26685	1.19547		6	0.324221	-1.15127	1.44426		6	0.31474	-1.16202	1.41815		6	0.340415	-1.1338	1.40743		6	0.34762	-1.1429	1.35431		6	0.168671	-1.58349	2.59881		6	0.317303	-1.23605	1.22359
6	0.400886	0.064051	1.90894		6	0.381464	0.063716	1.95817		6	0.430456	0.014716	2.446		6	0.404166	0.028783	2.39372		6	0.272937	-0.089077	2.54364		6	0.260915	-0.101265	2.48796		6	0.286991	-1.07482	4.051		6	0.402523	0.032532	2.09762
6	-3.12552	-6.95986	1.86702		6	-3.13311	-7.00612	1.9008		6	-3.0928	-7.07835	1.91126		6	-3.1232	-7.06949	1.94288		6	-3.1119	-7.11243	1.84357		6	-3.13075	-7.10115	1.8902		6	-2.74255	-7.91039	2.02743		6	-3.07669	-7.04777	1.82016
6	-4.17959	-7.56357	2.79707		6	-4.18825	-7.53574	2.87222		6	-4.11579	-7.25042	3.0368		6	-4.095	-7.26799	3.11039		6	-4.10594	-7.42002	2.96944		6	-4.12181	-7.42897	3.0114		6	-3.36772	-8.62369	3.23025		6	-4.12575	-7.56823	2.80644
6	-1.87078	-2.24066	3.38091		6	-1.95204	-2.27163	3.15271		6	-1.98218	-2.41862	3.13876		6	-2.08272	-2.26859	3.04527		6	-2.31388	-2.15593	2.49768		6	-2.32736	-2.13922	2.44875		6	-2.14676	-3.17179	3.68527		6	-2.13285	-2.14618	2.95669
6	-2.5787	-3.44796	1.02196		6	-2.43359	-3.54465	0.771507		6	-1.94679	-3.41151	0.507529		6	-1.95241	-3.5919	0.596386		6	-1.93864	-3.87183	0.461608		6	-1.96351	-3.95002	0.523304		6	-2.08788	-4.40186	1.33672		6	-2.17282	-3.73791	0.805147
6	-3.15384	-4.27352	3.53847		6	-3.23373	-4.25826	3.25131		6	-3.4238	-4.16052	2.43798		6	-3.47789	-4.1471	2.58888		6	-3.49245	-4.21426	2.61687		6	-3.47419	-4.2044	2.73574		6	-3.03664	-5.38047	3.66175		6	-3.36055	-4.251	3.14784
6	4.989	-3.4988	4.17985		6	5.03623	-3.63402	4.16318		6	5.17294	-3.78776	3.92875		6	5.11802	-3.789	3.99214		6	5.10818	-3.8167	3.92544		6	5.12914	-3.79646	3.94927		6	5.58117	-4.15429	2.70122		6	5.10463	-3.68019	4.02253
1	4.51039	-2.71615	4.7905		1	4.5532	-2.92735	4.85795		1	4.74429	-3.09968	4.67572		1	4.68556	-3.09419	4.73039		1	4.68368	-3.11462	4.66124		1	4.69819	-3.09075	4.67847		1	5.3542	-3.70527	3.68221		1	4.66638	-2.93983	4.71143
1	4.63994	-4.47794	4.54333		1	4.7135	-4.65095	4.43539		1	4.83758	-4.80748	4.17375		1	4.77452	-4.80555	4.23848		1	4.75496	-4.82913	4.17487		1	4.78476	-4.80828	4.21286		1	5.37821	-5.23447	2.76794		1	4.76368	-4.67977	4.33367
1	6.0769	-3.44622	4.3485		1	6.12636	-3.57484	4.32082		1	6.27059	-3.76143	4.03082		1	6.21436	-3.76838	4.1049		1	6.20453	-3.8071	4.03674		1	6.22619	-3.77531	4.06249		1	6.65966	-4.0247	2.50895		1	6.20009	-3.64843	4.13988
6	5.36492	-4.41391	1.85396		6	5.39545	-4.30101	1.75771		6	5.38701	-4.36334	1.4807		6	5.35149	-4.38082	1.54764		6	5.33437	-4.41933	1.48101		6	5.35867	-4.42647	1.51812		6	5.10484	-4.13681	0.223463		6	5.35346	-4.42978	1.62193
1	5.15027	-4.301	0.778878		1	5.16591	-4.08446	0.701406		1	5.10657	-4.0985	0.44801		1	5.08358	-4.11864	0.511127		1	5.06902	-4.15705	0.444017		1	5.08956	-4.18159	0.477383		1	4.52471	-3.68166	-0.596141		1	5.09382	-4.23279	0.569092
1	6.45726	-4.36291	1.9916		1	6.48967	-4.24435	1.8873		1	6.48723	-4.3371	1.55262		1	6.45069	-4.36275	1.6311		1	6.43335	-4.41206	1.56488		1	6.4591	-4.41154	1.59739		1	6.17614	-3.99831	-8.7e-05		1	6.45187	-4.40685	1.71288
1	5.03496	-5.41701	2.16561		1	5.08485	-5.33687	1.96652		1	5.06297	-5.39944	1.66596		1	5.0174	-5.41309	1.73563		1	4.99004	-5.44746	1.67287		1	5.01935	-5.45392	1.72301		1	4.8998	-5.21855	0.223971		1	5.01657	-5.44777	1.87233
6	5.25368	-1.93906	2.23494		6	5.22464	-1.88358	2.38777		6	5.31909	-1.96949	2.21375		6	5.29873	-1.98085	2.2675		6	5.30907	-2.01517	2.1935		6	5.31447	-2.01883	2.20085		6	5.14008	-1.9956	1.51534		6	5.29901	-1.98819	2.18665
1	5.0901	-1.75406	1.1614		1	5.06266	-1.6013	1.33536		1	5.09602	-1.63727	1.18736		1	5.09007	-1.65364	1.2366		1	5.10148	-1.68912	1.16205		1	5.1147	-1.70752	1.16335		1	4.59929	-1.46383	0.716305		1	5.10368	-1.72853	1.13416
1	4.81177	-1.10305	2.79997		1	4.75027	-1.11826	3.02277		1	4.91369	-1.21988	2.91201		1	4.89127	-1.2245	2.95712		1	4.91229	-1.25279	2.88263		1	4.90418	-1.24833	2.87298		1	4.94106	-1.47639	2.46632		1	4.88376	-1.18886	2.82091
1	6.34031	-1.92464	2.41337		1	6.30976	-1.8499	2.57667		1	6.41457	-1.97619	2.33025		1	6.39248	-1.9961	2.39655		1	6.40267	-2.04299	2.31981		1	6.40777	-2.03538	2.33791		1	6.21795	-1.90396	1.30572		1	6.39105	-1.99509	2.32935
6	2.31364	-9.5009	3.94325		6	2.34454	-9.53718	3.90106		6	2.43598	-9.51082	3.81799		6	2.4322	-9.50828	3.74846		6	2.40182	-9.46229	3.86658		6	2.40275	-9.48624	3.87615		6	3.25698	-9.94597	1.73264		6	2.39019	-9.48224	3.92756
1	2.95858	-9.09723	3.14673		1	2.97501	-9.14476	3.08724		1	3.03086	-9.14743	2.9648		1	3.02922	-9.10701	2.91409		1	3.01121	-9.09457	3.02572		1	3.03108	-9.07966	3.06767		1	3.59554	-9.28606	0.917909		1	3.02643	-9.07662	3.12497
1	2.40684	-8.84842	4.82606		1	2.4646	-8.87596	4.77417		1	2.59088	-8.8193	4.66159		1	2.56818	-8.84541	4.61778		1	2.52634	-8.76749	4.71242		1	2.50166	-8.82334	4.75058		1	3.56963	-9.49625	2.68853		1	2.48154	-8.82285	4.80541
1	2.70706	-10.4921	4.21788		1	2.73615	-10.5297	4.17603		1	2.84057	-10.4924	4.1121		1	2.84842	-10.4935	4.01163		1	2.81269	-10.4368	4.17357		1	2.81321	-10.4703	4.15464		1	3.78685	-10.9062	1.6266		1	2.7957	-10.4673	4.20715
6	0.803427	-10.5759	2.25421		6	0.787503	-10.6133	2.26163		6	0.813329	-10.6524	2.28869		6	0.840681	-10.6181	2.16194		6	0.831173	-10.6398	2.30615		6	0.884801	-10.6067	2.23158		6	1.38783	-10.8397	0.326927		6	0.882406	-10.5939	2.26179
1	1.23892	-11.5551	2.51198		1	1.20769	-11.5999	2.52006		1	1.24988	-11.6257	2.56875		1	1.29499	-11.5914	2.4105		1	1.28396	-11.5993	2.60461		1	1.32598	-11.5806	2.50251		1	1.9468	-11.7824	0.204115		1	1.32718	-11.5657	2.53149
1	-0.228177	-10.7464	1.90946		1	-0.252383	-10.7671	1.93371		1	-0.239229	-10.8244	2.01486		1	-0.20674	-10.8001	1.87558		1	-0.212204	-10.8371	2.01576		1	-0.148156	-10.7876	1.89624		1	0.3149	-11.074	0.249714		1	-0.148865	-10.7786	1.92356
1	1.38046	-10.1556	1.41456		1	1.35738	-10.2131	1.40692		1	1.3424	-10.286	1.39368		1	1.36871	-10.2086	1.28532		1	1.36981	-10.269	1.41901		1	1.4527	-10.2013	1.37791		1	1.65213	-10.1754	-0.5123		1	1.45222	-10.1811	1.41343
6	0.027623	-10.2605	4.63798		6	0.070283	-10.2652	4.65392		6	0.192437	-10.2032	4.6925		6	0.192266	-10.2686	4.57699		6	0.14475	-10.1782	4.69416		6	0.136107	-10.2518	4.6134		6	1.35649	-11.1497	2.83084		6	0.113807	-10.2499	4.6434
1	0.043941	-9.61296	5.52975		1	0.123773	-9.61558	5.54311		1	0.285031	-9.51791	5.55105		1	0.260777	-9.6111	5.45898		1	0.20144	-9.48021	5.54521		1	0.169617	-9.59363	5.49733		1	1.61755	-10.7173	3.81093		1	0.131426	-9.59048	5.52649
1	-1.02323	-10.4202	4.35127		1	-0.992096	-10.4009	4.39793		1	-0.880065	-10.3437	4.48579		1	-0.874088	-10.4273	4.35339		1	-0.9181	-10.3443	4.45985		1	-0.921288	-10.4083	4.34938		1	0.278271	-11.3727	2.83648		1	-0.938019	-10.4178	4.36469
1	0.453063	-11.2381	4.91718		1	0.479685	-11.2523	4.92727		1	0.609807	-11.1801	4.98858		1	0.630411	-11.2446	4.84313		1	0.575874	-11.1413	5.01242		1	0.561591	-11.2286	4.89909		1	1.89897	-12.104	2.7239		1	0.545498	-11.2217	4.93365
1	-4.07947	-7.15644	3.82164		1	-4.05822	-7.08885	3.87638		1	-3.92151	-6.53889	3.86089		1	-3.86632	-6.56405	3.93288		1	-3.92519	-6.75982	3.83889		1	-3.90714	-6.82198	3.91226		1	-3.00287	-8.19688	4.18379		1	-4.0177	-7.07691	3.79285
1	-5.18518	-7.2733	2.43032		1	-5.19554	-7.23594	2.51552		1	-5.13125	-7.02871	2.64961		1	-5.12751	-7.0494	2.77007		1	-5.13475	-7.216	2.61019		1	-5.14873	-7.16713	2.68325		1	-4.46674	-8.46967	3.21192		1	-5.1346	-7.30852	2.42602
1	-3.15846	-7.52834	0.920453		1	-3.18267	-7.64049	0.997636		1	-3.2163	-7.94317	1.23784		1	-3.26999	-7.91745	1.25351		1	-3.20317	-7.92096	1.09925		1	-3.23817	-7.89061	1.12722		1	-3.00435	-8.50201	1.13443		1	-3.11031	-7.70437	0.933491
1	-3.41143	-5.92981	1.6261		1	-3.41273	-5.99398	1.58898		1	-3.33413	-6.1839	1.32621		1	-3.38923	-6.16184	1.39095		1	-3.40631	-6.18931	1.33509		1	-3.43193	-6.16505	1.40881		1	-3.22602	-6.93655	1.8953		1	-3.37504	-6.05191	1.47689
1	1.99376	-7.07079	3.40015		1	2.02236	-7.09715	3.33901		1	2.07862	-7.08294	3.22834		1	2.04721	-7.07726	3.24272		1	2.02244	-7.05274	3.28304		1	2.01263	-7.05827	3.36528		1	2.59781	-7.54533	2.01887		1	2.02641	-7.05626	3.40556
1	-1.71699	-9.09568	2.578		1	-1.71356	-9.10582	2.59033		1	-1.65085	-9.12266	2.6152		1	-1.65683	-9.14068	2.56015		1	-1.65605	-9.15243	2.5701		1	-1.64893	-9.16128	2.50916		1	-1.02893	-9.83318	1.62652		1	-1.63829	-9.13843	2.53551
1	1.46551	0.36225	1.97271		1	1.44082	0.375292	2.04516		1	1.4874	0.322481	2.57323		1	1.46281	0.305717	2.5666		1	1.29987	0.151439	2.88394		1	1.28315	0.145784	2.83732		1	1.35391	-0.879752	4.2789		1	1.46082	0.321772	2.24917
1	0.02086	-0.036159	2.9364		1	-0.015162	-0.062215	2.9763		1	0.055275	-0.312135	3.42683		1	-0.028237	-0.257776	3.36347		1	-0.264487	-0.516168	3.40309		1	-0.28032	-0.535446	3.34168		1	-0.063837	-1.84761	4.75178		1	-0.028455	-0.172761	3.08884
1	0.643918	-1.16723	0.1446		1	0.680225	-1.1304	0.181093		1	0.754259	-0.834771	0.478533		1	0.775648	-0.869962	0.459357		1	0.913896	-0.708997	0.568375		1	0.925171	-0.713331	0.520197		1	0.532411	-0.795807	1.92133		1	0.777041	-1.02217	0.24426
1	-0.80932	-1.52792	1.09125		1	-0.795609	-1.51403	1.08087		1	-0.734783	-1.36874	1.27763		1	-0.739504	-1.37788	1.21977		1	-0.668251	-1.34025	1.0341		1	-0.658177	-1.35511	0.973588		1	-0.885287	-1.74967	2.34785		1	-0.736903	-1.46832	1.03641
1	2.87631	-1.41617	1.58812		1	2.85251	-1.40115	1.63256		1	2.91157	-1.37168	1.72348		1	2.90335	-1.37993	1.73521		1	2.91545	-1.39041	1.67651		1	2.92503	-1.40986	1.58666		1	2.68636	-1.56399	1.98456		1	2.91664	-1.43307	1.56369
1	2.98932	-5.41095	3.17222		1	3.01164	-5.43199	3.12388		1	3.0658	-5.5011	2.89369		1	3.02136	-5.4962	2.94681		1	2.99797	-5.50584	2.88972		1	3.00578	-5.47364	3.00355		1	3.33071	-5.8123	1.78124		1	3.01246	-5.44811	3.09207
6	0.241351	1.68524	0.168791		6	0.223134	1.71378	0.243796		6	-1.52816	-4.4634	5.1113		6	-1.51328	-4.16619	4.613		6	-1.42087	-3.87068	4.3414		6	-1.38539	-3.74385	4.38618		6	-0.562955	-5.21794	4.78705		6	-1.06366	-4.01876	4.61647
1	0.366477	0.976305	-0.67167		1	0.349664	1.02032	-0.609605		8	-2.65128	-4.66036	5.4354		8	-2.56826	-4.34727	5.2523		8	-2.0568	-4.87081	5.03556		8	-1.84713	-4.80097	5.13819		8	-0.953292	-3.95951	6.16733		6	0.317041	1.81237	0.515632
1	-0.417422	2.50114	-0.164465		1	-0.431605	2.53798	-0.078202		8	-0.358607	-4.38955	5.27369		8	-0.33997	-4.19932	5.01511		8	-0.711046	-3.1127	4.98744		8	-0.81445	-2.85274	5.00535		8	0.177637	-5.98054	5.25938		1	0.482733	1.18691	-0.382139
1	1.23599	2.10909	0.410384		1	1.21911	2.13164	0.493073		6	0.183109	1.93401	1.05126		6	0.307206	1.92754	0.955485		1	-1.79336	-4.77486	5.97449		1	-1.59469	-4.60683	6.06483		1	-0.082664	-3.92067	6.59731		1	-0.329454	2.6564	0.232042
6	-4.97874	-9.60032	3.68383		6	-5.03536	-9.50449	3.86127		1	0.244771	1.40722	0.079853		1	0.453076	1.37369	0.00847		6	0.336287	1.99169	1.38954		6	0.321398	1.9869	1.34651		6	0.070027	1.28904	3.8403		1	1.298	2.21132	0.841386
1	-4.81614	-10.6864	3.62028		1	-4.91327	-10.598	3.84287		1	-0.477948	2.80536	0.927453		1	-0.336246	2.79624	0.749403		1	0.602328	1.57914	0.39786		1	0.597656	1.57965	0.355087		1	0.154117	1.32771	2.73742		6	-4.91038	-9.51972	3.87589
1	-4.83369	-9.27858	4.734		1	-4.86153	-9.14513	4.89539		1	1.19873	2.29564	1.30878		1	1.29702	2.2931	1.29432		1	-0.284379	2.88689	1.23448		1	-0.299403	2.88204	1.18894		1	-0.592204	2.10691	4.16253		1	-4.7477	-10.6073	3.90355
1	-6.02717	-9.38022	3.40076		1	-6.08221	-9.26042	3.58936		6	-4.93287	-8.8203	4.59858		6	-4.83214	-8.87114	4.67789		1	1.27308	2.29294	1.89846		1	1.25458	2.2906	1.86191		1	1.07864	1.46285	4.26566		1	-4.75122	-9.109	4.89252
										1	-4.82233	-9.87369	4.89744		1	-4.69198	-9.92589	4.95833		6	-4.8261	-9.1352	4.42103		6	-4.92231	-9.18046	4.37217		6	-3.54789	-10.7225	4.29254		1	-5.96303	-9.32446	3.59006
										1	-4.69724	-8.17788	5.47067		1	-4.57475	-8.23481	5.54787		1	-4.65682	-10.1996	4.64117		1	-4.80621	-10.2618	4.53948		1	-3.25831	-11.7765	4.166		8	-1.38006	-3.73376	5.69851
										1	-5.99143	-8.64033	4.32189		1	-5.90272	-8.70636	4.44196		1	-4.60961	-8.54366	5.33249		1	-4.68534	-8.64788	5.31505		1	-3.11403	-10.3419	5.23762
																				1	-5.89468	-8.98965	4.16635		1	-5.98249	-8.97202	4.12319		1	-4.65211	-10.6668	4.37841
																														7	-2.4818	-4.60727	8.08194
																														6	-1.6014	-4.71359	9.28317
																														1	-0.800385	-5.42706	9.04712
																														1	-2.19151	-5.12401	10.1217
																														6	-3.13468	-5.91153	7.75851
																														1	-3.58695	-5.81507	6.76273
																														1	-3.94497	-6.08955	8.4878
																														6	-3.49661	-3.52611	8.25555
																														1	-2.95902	-2.57515	8.36513
																														1	-4.0509	-3.71499	9.19261
																														6	-0.917848	-3.40803	9.71116
																														1	-1.64319	-2.69416	10.1394
																														1	-0.456795	-2.92394	8.83466
																														6	-4.4847	-3.34951	7.09772
																														1	-5.1429	-4.22896	6.98899
																														1	-3.93487	-3.22467	6.15318
																														6	-2.20017	-7.12687	7.70951
																														1	-1.8743	-7.42374	8.72181
																														1	-1.29973	-6.89068	7.12344
																														8	0.122649	-3.6893	10.6251
																														8	-5.23712	-2.16855	7.29697
																														8	-2.84572	-8.19931	7.04782
																														1	-0.277649	-3.95383	11.4668
																														1	-5.84729	-2.32056	8.03405
																														1	-3.58393	-8.50553	7.59594
																														1	-1.76085	-4.30821	7.13935

## Sheet: Mn-bpyOMe_HCOO
Structure name	spin multiplicity	Charge			Structure name	spin multiplicity	Charge			Structure name	spin multiplicity	Charge			Structure name	spin multiplicity	Charge			Structure name	spin multiplicity	Charge			Structure name	spin multiplicity	Charge			Structure name	spin multiplicity	Charge			Structure name	spin multiplicity	Charge			Structure name	spin multiplicity	Charge			Structure name	spin multiplicity	Charge
Mn_I_Br_0_1	1	0			Mn_0_Br_-1_2	2	-1			Mn_0_Br_-1_2_ dissociated	2	-1			Mn_0_Br_-2_1_ dissociated	1	-2			Mn_0_0_2	2	0			MnL•−_0_-1_1	1	-1			IRC_TS-1a'	1	-1			TS-1a'	1	-1			Mn_I_H_0_1	1	0			TS-2a'	1	0
Atom number	x	y	z		Atom number	x	y	z		Atom number	x	y	z		Atom number	x	y	z		Atom number	x	y	z		Atom number	x	y	z		Atom number	x	y	z		Atom number	x	y	z		Atom number	x	y	z		Atom number	x	y	z
35	12.3546	3.69798	4.9438		35	12.3917	3.47186	5.08365		35	10.5837	6.2034	10.8782		35	10.3538	5.63562	10.496		25	11.0721	4.91004	3.74127		25	10.9406	5.17583	3.55875		25	10.1215	6.25735	3.28184		25	10.1634	6.04882	3.25625		25	11.1672	4.62193	3.94876		25	11.1342	4.72116	3.85327
25	10.9415	5.2857	3.44334		25	10.9717	5.17746	3.51996		25	11.0866	4.74101	3.67867		25	10.9067	5.22525	3.40747		8	13.8385	4.99354	2.71703		8	13.4272	5.70133	2.06498		8	12.8212	6.50555	2.11732		8	12.6741	6.58665	1.82051		8	14.0378	4.50162	3.29532		8	13.9569	4.72229	2.99457
8	13.4039	5.92708	1.93276		8	13.488	5.73322	2.06645		8	13.8928	4.61415	2.77132		8	13.3324	5.80895	1.83677		8	11.3183	1.95601	3.58954		8	11.5939	2.29174	3.49104		8	9.96849	4.12218	1.24194		8	10.0047	3.88381	1.26697		8	11.0494	1.76844	3.21739		8	11.1087	1.93513	2.87556
8	10.8273	3.01827	1.54011		8	10.8764	2.87154	1.66367		8	11.0517	1.79282	3.3392		8	11.6842	2.37975	3.44257		8	9.97556	5.57717	1.06247		8	9.41545	5.6472	1.07602		8	8.82964	8.23372	1.53894		8	8.53595	7.90524	1.63293		8	10.3346	5.86375	1.3649		8	10.1518	6.0943	1.40198
8	9.23707	7.0383	1.78461		8	9.34229	6.93555	1.81927		8	10.1353	5.67732	1.02523		8	9.31202	5.51685	0.947263		8	6.70311	2.97379	1.42393		8	6.80257	2.55477	1.55278		8	7.36239	1.46119	3.01957		8	7.43064	1.28184	3.22208		8	6.73527	3.41431	1.29637		8	6.80107	3.22426	1.32079
8	6.90216	2.26298	1.75465		8	6.86523	2.50553	1.60862		8	6.55954	3.44602	1.2517		8	6.77567	2.38937	1.63061		7	11.3639	6.5294	4.97279		7	11.3503	6.55982	4.93564		7	10.6492	7.42072	4.84722		7	10.7104	7.23586	4.82854		7	11.3987	6.35672	5.05215		7	11.3784	6.42036	4.9938
7	11.295	6.75547	4.86506		7	11.3538	6.64272	4.90554		7	11.455	6.32435	4.93576		7	11.3152	6.63553	4.73325		7	9.26642	4.92611	4.85328		7	9.27085	5.00732	4.80166		7	8.63837	5.79866	4.66912		7	8.63498	5.64939	4.67738		7	9.25111	4.81564	4.91318		7	9.25454	4.8283	4.89266
7	9.27492	4.98198	4.81154		7	9.29038	4.92188	4.82525		7	9.27092	4.8442	4.76961		7	9.29274	5.03015	4.69858		6	12.7479	4.96095	3.12387		6	12.4414	5.49398	2.66413		6	11.7558	6.38639	2.60164		6	11.6799	6.36976	2.39998		6	12.9025	4.55777	3.52281		6	12.8459	4.73412	3.31394
6	12.4423	5.69146	2.52256		6	12.5078	5.52447	2.6425		6	12.7867	4.66144	3.13278		6	12.3698	5.57798	2.46485		6	12.4189	7.37353	4.93861		6	12.4594	7.36323	4.98335		6	11.7565	8.2164	4.92718		6	11.8453	7.97685	4.91509		6	12.4381	7.20753	4.97405		6	12.4198	7.27056	4.9217
6	12.363	7.57344	4.88596		6	12.4131	7.47605	4.92666		6	12.5258	7.14602	4.89256		6	12.4195	7.45488	4.75192		1	13.1406	7.22413	4.13426		1	13.1919	7.21383	4.18811		1	12.4435	8.17275	4.08108		1	12.5345	7.91313	4.07246		1	13.1775	7.01163	4.19567		1	13.142	7.10157	4.12164
1	13.0508	7.51628	4.04191		1	13.1212	7.38573	4.09975		1	13.2729	6.9402	4.12452		1	13.1309	7.31538	3.93666		6	12.6177	8.38262	5.8665		6	12.6936	8.31482	5.94488		6	12.0479	9.0306	5.99732		6	12.1642	8.77182	5.99919		6	12.6021	8.28954	5.82876		6	12.6056	8.32082	5.80897
6	12.622	8.46087	5.92114		6	12.654	8.41135	5.91614		6	12.7046	8.2097	5.76261		6	12.672	8.40136	5.71221		1	13.5016	9.01432	5.76258		1	13.6164	8.89565	5.88323		1	12.9722	9.61112	5.96668		1	13.1139	9.30987	5.98119		1	13.4755	8.92931	5.69138		1	13.4801	8.9602	5.67795
1	13.5177	9.08105	5.85796		1	13.5473	9.03359	5.84497		1	13.6018	8.82094	5.65275		1	13.5915	8.9848	5.62885		6	11.6982	8.5712	6.91947		6	11.746	8.5344	6.99872		6	11.1701	9.09447	7.11946		6	11.2887	8.85947	7.10846		6	11.6566	8.54253	6.84038		6	11.6806	8.54093	6.84707
6	11.7485	8.53581	7.02082		6	11.734	8.53181	7.00785		6	11.7407	8.48949	6.75335		6	11.7569	8.61234	6.79432		6	11.9216	9.66792	7.97089		6	12.0121	9.59975	8.07214		6	11.5317	9.94027	8.34802		6	11.6811	9.65717	8.35947		6	11.826	9.73185	7.79849		6	11.8802	9.68963	7.84731
6	12.0341	9.48819	8.19083		6	11.9993	9.54587	8.13143		6	11.9222	9.67042	7.71885		6	12.0648	9.64009	7.89298		6	12.0123	11.0406	7.26261		6	12.1888	10.9807	7.39608		6	11.7436	11.4131	7.92594		6	11.9975	11.12	7.9721		6	11.8529	11.0413	6.97394		6	11.9393	11.0288	7.07414
6	12.1352	10.9347	7.6511		6	12.1156	10.965	7.52556		6	12.2441	10.9534	6.91732		6	12.381	11.0145	7.25817		1	11.0806	11.268	6.71952		1	11.2757	11.2725	6.85136		1	10.8205	11.8373	7.49756		1	11.1132	11.6147	7.53826		1	10.9125	11.1757	6.41519		1	11.0034	11.2072	6.52033
1	11.1941	11.2439	7.16808		1	11.1817	11.2542	7.01587		1	11.4304	11.1971	6.21489		1	11.5196	11.3898	6.68114		1	12.846	11.0797	6.54472		1	13.0256	10.9824	6.68024		1	12.5445	11.5162	7.1773		1	12.8183	11.1851	7.24108		1	12.6851	11.0555	6.25333		1	12.7731	11.053	6.35579
1	12.9492	11.046	6.91829		1	12.9364	11.0338	6.79492		1	13.1778	10.862	6.34192		1	13.2482	10.9686	6.58121		1	12.1753	11.8354	8.00858		1	12.3956	11.7548	8.1541		1	12.0243	12.0231	8.80058		1	12.3016	11.6891	8.8659		1	11.9768	11.9047	7.64769		1	12.0821	11.8616	7.78158
1	12.3365	11.6289	8.48284		1	12.3127	11.7037	8.32035		1	12.3631	11.8029	7.60899		1	12.6121	11.7533	8.04375		6	10.7824	9.72335	9.00393		6	10.8605	9.70196	9.08796		6	10.4342	9.89566	9.42618		6	10.5641	9.66093	9.41829		6	10.6816	9.82036	8.82372		6	10.7405	9.76756	8.87831
6	10.9307	9.43846	9.26249		6	10.8775	9.56028	9.18513		6	10.6606	9.92959	8.5628		6	10.8863	9.81878	8.86771		1	10.688	8.77951	9.56399		1	10.7061	8.75461	9.62875		1	10.27	8.87332	9.80222		1	10.333	8.64468	9.77503		1	10.6247	8.91953	9.45532		1	10.6655	8.84761	9.47956
1	10.8375	8.43667	9.71086		1	10.7701	8.58392	9.68387		1	10.4191	9.07941	9.2191		1	10.6511	8.88623	9.404		1	9.81137	9.94318	8.53214		1	9.91036	9.97618	8.60206		1	9.47353	10.2799	9.04736		1	9.63527	10.1098	9.03144		1	9.70365	9.96337	8.33713		1	9.76502	9.94772	8.39909
1	9.94924	9.72765	8.85429		1	9.90454	9.82627	8.74202		1	9.78424	10.1404	7.92872		1	9.97507	10.1539	8.34614		1	10.9875	10.5227	9.73296		1	11.0906	10.4783	9.83526		1	10.7305	10.5211	10.2833		1	10.8849	10.2528	10.29		1	10.8516	10.6823	9.48751		1	10.9306	10.6024	9.57058
1	11.1757	10.1425	10.0729		1	11.1071	10.3067	9.96236		1	10.827	10.8073	9.20683		1	11.1412	10.58	9.62261		6	13.2495	9.38034	8.71228		6	13.3087	9.24076	8.83783		6	12.8421	9.38532	8.95803		6	12.9412	8.99921	8.97438		6	13.1626	9.57545	8.56257		6	13.2146	9.46727	8.59896
6	13.3775	9.08285	8.84417		6	13.328	9.18309	8.83786		6	13.1005	9.34269	8.66878		6	13.295	9.15268	8.69824		1	14.109	9.3707	8.02416		1	14.1772	9.17746	8.16347		1	13.6808	9.44974	8.24701		1	13.7989	9.04098	8.28469		1	14.0261	9.55166	7.88		1	14.0742	9.44675	7.91119
1	14.2138	9.13544	8.1299		1	14.1775	9.1855	8.13706		1	14.0364	9.1756	8.11246		1	14.1756	9.01642	8.05023		1	13.2119	8.40642	9.22683		1	13.2058	8.2703	9.3508		1	12.722	8.32747	9.24452		1	12.7505	7.94067	9.21398		1	13.1718	8.64899	9.15947		1	13.2005	8.51773	9.15822
1	13.3299	8.05588	9.24122		1	13.2691	8.18221	9.29635		1	12.8853	8.43995	9.26249		1	13.0804	8.18937	9.18973		1	13.4328	10.16	9.4695		1	13.5302	10.0074	9.59929		1	13.1197	9.95755	9.85908		1	13.2284	9.51971	9.90292		1	13.3016	10.4258	9.24981		1	13.3794	10.2853	9.31896
1	13.6052	9.76288	9.68102		1	13.5475	9.91175	9.63613		1	13.2653	10.1804	9.36639		1	13.5606	9.88477	9.47972		6	10.6027	7.70368	6.93525		6	10.6225	7.73026	6.96232		6	10.0268	8.31883	7.02584		6	10.1046	8.13775	6.99527		6	10.5733	7.65938	6.89756		6	10.5954	7.66033	6.89625
6	10.6349	7.69079	6.975		6	10.6391	7.69055	6.98149		6	10.6437	7.62356	6.79819		6	10.636	7.80406	6.78124		1	9.84847	7.7986	7.71192		1	9.85576	7.83493	7.728		1	9.30617	8.30887	7.84064		1	9.37855	8.15023	7.8046		1	9.79196	7.80565	7.63879		1	9.83362	7.78331	7.66114
1	9.92356	7.69266	7.79592		1	9.9098	7.73024	7.78714		1	9.85563	7.78064	7.53017		1	9.89479	7.89221	7.57289		6	10.4503	6.70473	5.95899		6	10.4207	6.7517	5.94763		6	9.77119	7.49526	5.89931		6	9.83165	7.34398	5.8618		6	10.4619	6.58767	5.99712		6	10.4628	6.61753	5.96529
6	10.426	6.81909	5.89373		6	10.4318	6.73927	5.93154		6	10.524	6.55635	5.89309		6	10.4171	6.82544	5.77286		6	9.28959	5.79351	5.90787		6	9.2761	5.89282	5.87154		6	8.61491	6.64551	5.76504		6	8.62205	6.53606	5.72045		6	9.29904	5.67348	5.97		6	9.30307	5.6982	5.94031
6	9.26253	5.90538	5.81511		6	9.30883	5.85671	5.86382		6	9.36169	5.64681	5.86937		6	9.29514	5.93515	5.74645		6	8.26976	5.84155	6.8609		6	8.2177	5.9279	6.81371		6	7.5392	6.68154	6.6763		6	7.53086	6.66164	6.59283		6	8.29368	5.72746	6.93622		6	8.30148	5.75982	6.90938
6	8.21821	6.00112	6.73427		6	8.23656	5.93046	6.79736		6	8.41094	5.63184	6.89167		6	8.27401	5.95398	6.7323		1	8.34923	6.54465	7.68783		1	8.27454	6.65112	7.62698		1	7.57711	7.4039	7.49115		1	7.57302	7.41379	7.37924		1	8.4029	6.40751	7.77923		1	8.40619	6.45749	7.73791
1	8.25183	6.77567	7.49706		1	8.27607	6.70045	7.56666		1	8.57589	6.24725	7.77456		1	8.33541	6.70356	7.51739		6	7.1546	4.99896	6.76584		6	7.13339	5.0725	6.72429		6	6.44587	5.83856	6.54567		6	6.3987	5.85961	6.45171		6	7.15486	4.91432	6.83438		6	7.17122	4.93421	6.83069
6	7.12519	5.12531	6.68148		6	7.15401	5.07451	6.74088		6	7.27469	4.81661	6.80112		6	7.24201	5.03672	6.72126		6	6.04541	5.03926	7.82726		6	5.99161	5.12099	7.75693		6	5.26446	5.89961	7.53014		6	5.18813	6.02567	7.38503		6	6.06729	4.94512	7.91801		6	6.0842	4.98351	7.9135
6	5.96603	5.25603	7.67935		6	5.98996	5.19681	7.74289		6	6.25878	4.752	7.9508		6	6.15082	4.96747	7.80072		6	4.9246	4.0274	7.52914		6	4.89124	4.08728	7.45276		6	4.1438	4.91373	7.15021		6	4.03074	5.08511	7.00218		6	4.91335	3.97574	7.60492		6	4.94686	3.98481	7.6347
6	4.87995	4.19192	7.44271		6	4.92651	4.10322	7.53014		6	5.02531	3.9074	7.58228		6	4.75346	4.89495	7.14277		1	4.42938	4.23226	6.5667		1	4.42862	4.25691	6.4674		1	3.74359	5.11793	6.1442		1	3.67706	5.26997	5.97526		1	4.40214	4.23389	6.66395		1	4.43073	4.20129	6.68589
1	4.43609	4.27464	6.43792		1	4.46961	4.1636	6.52971		1	4.496	4.31784	6.70746		1	4.56435	5.78356	6.51797		1	4.15788	4.08788	8.31731		1	4.0956	4.15967	8.21152		1	3.31181	5.00579	7.86644		1	3.18129	5.25037	7.68352		1	4.16667	4.02305	8.413		1	4.19963	4.04715	8.4412
1	4.07014	4.32567	8.17683		1	4.12013	4.22124	8.27173		1	4.32063	3.90028	8.42848		1	3.97112	4.85273	7.91855		1	5.30147	2.99243	7.50876		1	5.2794	3.05645	7.47435		1	4.48847	3.86774	7.17534		1	4.31743	4.02458	7.08115		1	5.26159	2.93309	7.53296		1	5.31314	2.94647	7.5984
1	5.27361	3.17013	7.56299		1	5.34823	3.09278	7.65254		1	5.29209	2.86131	7.36422		1	4.63875	4.00279	6.50823		6	5.43377	6.46028	7.86198		6	5.3526	6.52983	7.74804		6	4.6726	7.32864	7.53822		6	4.67813	7.48402	7.30793		6	5.49409	6.37881	8.02043		6	5.48949	6.41123	7.96422
6	5.33031	6.65842	7.52177		6	5.31192	6.57661	7.56521		6	5.78732	6.18054	8.30936		6	6.18052	6.19339	8.73296		1	4.63506	6.50612	8.62009		1	4.53136	6.58427	8.48249		1	3.82701	7.38872	8.24373		1	3.80969	7.61458	7.97418		1	4.71195	6.41378	8.79616		1	4.70528	6.46222	8.7369
1	4.49359	6.77019	8.23021		1	4.46929	6.68431	8.26909		1	5.04876	6.13449	9.126		1	5.36111	6.1215	9.46627		1	4.9946	6.72526	6.88649		1	4.93732	6.76814	6.75496		1	4.30215	7.60813	6.53825		1	4.36361	7.73962	6.28299		1	5.0423	6.69296	7.06552		1	5.03549	6.68473	6.99794
1	4.93683	6.80265	6.50253		1	4.91754	6.69337	6.54236		1	5.30988	6.66942	7.44458		1	6.04881	7.13276	8.17188		1	6.1837	7.22467	8.11829		1	6.08518	7.31082	8.00495		1	5.41842	8.07826	7.8453		1	5.44874	8.20642	7.61843		1	6.26729	7.11433	8.29146		1	6.25193	7.16663	8.21006
1	6.0531	7.4634	7.72698		1	6.01605	7.40231	7.75304		1	6.61784	6.81804	8.64874		1	7.1229	6.26066	9.29823		6	6.65672	4.70427	9.20867		6	6.55833	4.82651	9.16599		6	5.76558	5.54659	8.95096		6	5.62177	5.70953	8.83626		6	6.69724	4.5404	9.27208		6	6.72051	4.63726	9.28074
6	6.51356	5.0958	9.11762		6	6.52803	5.07637	9.18765		6	6.95051	4.11254	9.17969		6	6.38556	3.69643	8.65318		1	5.87182	4.73308	9.98191		1	5.75235	4.86066	9.91837		1	4.93271	5.58836	9.67303		1	4.76703	5.83229	9.52187		1	5.92931	4.56098	10.0624		1	5.95155	4.67126	10.0695
1	5.69013	5.19744	9.84298		1	5.70173	5.1704	9.91224		1	6.23756	4.0473	10.0181		1	5.60776	3.60278	9.43009		1	7.43885	5.42319	9.49769		1	7.32316	5.5625	9.45901		1	6.54339	6.24714	9.29336		1	6.42554	6.38029	9.17771		1	7.50526	5.22573	9.57162		1	7.51532	5.34737	9.55642
1	7.2682	5.86039	9.35847		1	7.26497	5.86162	9.41661		1	7.81695	4.7014	9.51971		1	7.3663	3.74143	9.15458		1	7.10096	3.69571	9.21003		1	7.01805	3.82529	9.20442		1	6.18939	4.52931	8.97762		1	5.98357	4.67206	8.92321		1	7.11265	3.52066	9.22588		1	7.15442	3.62431	9.26963
1	6.97294	4.104	9.25821		1	7.01216	4.09905	9.34854		1	7.29983	3.09302	8.94866		1	6.35852	2.78449	8.03551		6	7.13019	4.15486	5.65227		6	7.15745	4.16914	5.63153		6	6.5249	4.91589	5.47478		6	6.46726	4.89521	5.43112		6	7.08467	4.11759	5.69027		6	7.10916	4.10574	5.70937
6	7.1852	4.15752	5.68065		6	7.18542	4.1095	5.6999		6	7.15013	4.08434	5.61568		6	7.27163	4.10166	5.65093		1	6.29265	3.47859	5.48327		1	6.3525	3.44872	5.48784		1	5.73061	4.18583	5.33208		1	5.64401	4.19913	5.28086		1	6.21566	3.48897	5.49821		1	6.25157	3.45555	5.54053
1	6.3977	3.41221	5.57559		1	6.38806	3.37665	5.58866		1	6.27793	3.45656	5.43594		1	6.50211	3.33091	5.57364		6	8.17116	4.13958	4.71115		6	8.19802	4.16155	4.70728		6	7.59576	4.89995	4.59004		6	7.57441	4.79641	4.58536		6	8.12253	4.09322	4.74216		6	8.13914	4.07524	4.75377
6	8.25322	4.09845	4.76586		6	8.23383	4.07118	4.7757		6	8.13908	4.11296	4.62043		6	8.25708	4.12492	4.67443		6	7.99251	3.25431	3.50265		6	8.08896	3.17347	3.56391		6	7.67365	3.8395	3.52508		6	7.64789	3.69665	3.56048		6	7.88119	3.31575	3.47344		6	7.9005	3.24121	3.5213
6	8.18135	3.00277	3.73031		6	8.10554	3.0322	3.68088		6	7.8628	3.3645	3.34042		6	8.14065	3.10975	3.55579		1	8.95662	3.05685	3.02644		1	9.0541	3.08135	3.05813		1	7.43635	4.27752	2.54106		1	7.35636	4.08525	2.57015		1	8.82372	3.00953	3.01346		1	8.84022	2.88523	3.09519
1	9.1864	2.66055	3.46187		1	9.08575	2.61609	3.42246		1	8.79655	3.1099	2.83076		1	9.08349	3.05114	3.00456		1	7.56517	2.29049	3.82328		1	7.82324	2.18306	3.97129		1	8.72571	3.53087	3.46799		1	8.70399	3.41704	3.47804		1	7.30516	2.40557	3.70277		1	7.30552	2.35572	3.79338
1	7.66657	2.14556	4.19123		1	7.50185	2.2004	4.07563		1	7.33291	2.42749	3.57396		1	7.94206	2.11643	3.99313		6	7.02064	3.86656	2.4698		6	7.00066	3.54999	2.54075		6	6.85276	2.56715	3.76033		6	6.87817	2.41107	3.88998		6	7.06515	4.14577	2.45634		6	7.11317	4.01966	2.44316
6	7.3491	3.38428	2.48374		6	7.36068	3.54477	2.42998		6	6.96221	4.18171	2.3865		6	6.9856	3.41602	2.5836		1	7.44113	4.80834	2.06725		1	7.24336	4.52083	2.06908		1	5.78421	2.70908	3.51356		1	5.8035	2.49414	3.64316		1	7.61971	5.06805	2.19475		1	7.67765	4.92205	2.1396
1	7.91328	4.07964	1.83195		1	7.99715	4.23343	1.8418		1	7.48012	5.11378	2.08804		1	7.16229	4.38393	2.07721		1	6.06587	4.11146	2.96265		1	6.03167	3.65942	3.05368		1	6.91741	2.26042	4.81524		1	6.96124	2.18243	4.96359		1	6.11019	4.45033	2.91482		1	6.15214	4.35541	2.8657
1	6.43918	3.91019	2.81505		1	6.47623	4.11371	2.75951		1	6.03669	4.46747	2.91221		1	6.04169	3.49965	3.14588		6	11.1935	3.11244	3.65764		6	11.3227	3.43348	3.54453		6	9.96765	4.91835	2.10823		6	10.0087	4.7045	2.10619		6	11.0388	2.90284	3.4586		6	11.0439	3.03583	3.22584
6	10.7896	3.87706	2.30859		6	10.8254	3.74604	2.41973		6	11.0354	2.95001	3.47709		6	11.362	3.51017	3.45708		6	10.3888	5.31586	2.11983		6	10.0017	5.45804	2.07746		6	9.3032	7.45737	2.27746		6	9.14764	7.20627	2.33918		6	10.637	5.40982	2.3867		6	10.5189	5.56974	2.36359
6	9.90679	6.35998	2.43345		6	9.99526	6.24618	2.48068		6	10.4964	5.31323	2.07108		6	9.92424	5.39845	1.94541		6	7.70712	2.80702	0.443701		6	7.79922	2.48717	0.555552		6	7.1556	1.50693	1.61603		6	7.21434	1.22877	1.82029		6	7.78003	3.27812	0.35508		6	7.86144	3.03465	0.406039
6	7.8746	1.62356	0.954402		6	7.82026	1.8715	0.785921		6	7.54114	3.29912	0.246272		6	7.71697	2.3393	0.58041		1	8.02879	3.77696	0.019375		1	7.9589	3.46775	0.068357		1	6.08247	1.63044	1.38105		1	6.1359	1.29378	1.58585		1	8.17688	4.26309	0.042351		1	8.26575	4.00071	0.046961
1	8.33512	2.32505	0.23258		1	8.34272	2.59668	0.13179		1	7.93182	4.27844	-0.089027		1	7.80297	3.31203	0.059949		1	8.6049	2.29298	0.836772		1	8.77521	2.14425	0.949366		1	7.72325	2.32486	1.13897		1	7.74548	2.03671	1.28692		1	8.62566	2.6775	0.740539		1	8.69874	2.45348	0.836523
1	8.68595	1.16929	1.55263		1	8.58815	1.32481	1.36407		1	8.40087	2.68597	0.576961		1	8.72862	2.05276	0.926275		1	7.28187	2.18924	-0.361471		1	7.46078	1.76372	-0.201851		1	7.50455	0.548415	1.20552		1	7.60049	0.26117	1.4689		1	7.366	2.76577	-0.526138		1	7.46076	2.47651	-0.453258
1	7.36504	0.824176	0.39576		1	7.28242	1.14958	0.152506		1	7.06524	2.79367	-0.607409		1	7.3712	1.58006	-0.137701												7	12.1568	3.25135	4.69463		7	12.0342	3.60427	4.71863		1	11.6059	3.88394	5.31081		1	11.6663	3.93797	5.21246
																														6	12.5232	3.82241	6.04117		6	12.4368	4.15454	6.03722							6	11.9159	3.16284	6.64878
																														1	13.1484	4.70485	5.85799		1	12.8654	5.15215	5.86938							8	11.6193	3.98353	7.45296
																														1	13.1252	3.06095	6.56093		1	13.2277	3.51155	6.46938							8	12.2956	2.09245	6.30704
																														6	13.3809	2.83293	3.92045		6	13.2149	3.32067	3.8639
																														1	13.0516	2.57218	2.90738		1	12.8595	3.20338	2.82956
																														1	13.7725	1.9268	4.40854		1	13.6652	2.36023	4.17826
																														6	11.1638	2.11795	4.82224		6	11.1634	2.40759	4.87493
																														1	10.2367	2.55503	5.21467		1	10.1795	2.75993	5.21889
																														1	11.5667	1.41977	5.57095		1	11.5788	1.76141	5.66972
																														6	11.3344	4.27702	6.89486		6	11.315	4.31489	7.06701
																														1	10.7433	3.41838	7.25674		1	10.9215	3.33554	7.38984
																														1	10.6757	4.91193	6.28331		1	10.482	4.87962	6.62756
																														6	10.8361	1.36771	3.52062		6	10.9464	1.5306	3.63078
																														1	11.7189	0.810021	3.16884		1	11.8923	1.04739	3.33822
																														1	10.563	2.08828	2.72915		1	10.6132	2.13634	2.773
																														6	14.4846	3.88971	3.78729		6	14.3156	4.38786	3.8467
																														1	14.946	4.11852	4.76318		1	14.8263	4.44953	4.82384
																														1	14.0646	4.82191	3.37987		1	13.8894	5.37632	3.6282
																														8	11.806	5.06654	7.96762		8	11.7813	5.06173	8.1771
																														8	9.80987	0.439986	3.77691		8	10.0247	0.504988	3.93767
																														8	15.4457	3.42616	2.86071		8	15.2352	4.10483	2.80808
																														1	12.2221	4.48233	8.61917		1	12.4249	4.52112	8.65912
																														1	8.94037	0.843596	3.56025		1	9.11613	0.820413	3.74842
																														1	15.9627	2.72342	3.28295		1	15.7265	3.30524	3.04818
																														1	11.6793	4.02487	4.16226		1	11.2786	4.62366	4.04916
[truncated: 20 more columns]

## Sheet: Mn-bpyOMe_CO
Structure name	spin multiplicity	Charge			Structure name	spin multiplicity	Charge			Structure name	spin multiplicity	Charge			Structure name	spin multiplicity	Charge			Structure name	spin multiplicity	Charge			Structure name	spin multiplicity	Charge			Structure name	spin multiplicity	Charge			Structure name	spin multiplicity	Charge
Mn_0_0_2	2	0			MnL•−_0_-1_1	1	-1			TS-1b'	1	-1			Mn_I_CO2_-1_1	1	-1			Mn_I_CO2H_0_1	1	0			Mn_0_CO2H_-1_2	2	-1			TS-2b'	2	0			Mn_0_CO_0_2	2	0
Atom number	x	y	z		Atom number	x	y	z		Atom number	x	y	z		Atom number	x	y	z		Atom number	x	y	z		Atom number	x	y	z		Atom number	x	y	z		Atom number	x	y	z
25	11.0721	4.91004	3.74127		25	10.9406	5.17583	3.55875		25	10.9402	5.02188	3.67767		25	11.0483	4.7976	3.82361		25	11.1396	4.72566	3.90079		25	11.1274	4.7293	3.8836		25	11.1544	4.86111	3.96846		25	11.1875	4.61916	4.02399
8	13.8385	4.99354	2.71703		8	13.4272	5.70133	2.06498		8	13.4613	5.45468	2.21455		8	13.7899	4.8792	2.74964		8	13.9258	4.80148	2.93316		8	13.9003	4.86038	2.88984		8	13.9028	5.021	2.88482		8	13.9815	4.73255	3.02101
8	11.3183	1.95601	3.58954		8	11.5939	2.29174	3.49104		8	11.3978	2.12972	3.26288		8	11.0683	1.95443	3.02787		8	11.0727	2.04463	2.65631		8	11.0749	2.06096	2.61913		8	11.0425	2.3736	2.37013		8	11.0355	2.07515	2.49128
8	9.97556	5.57717	1.06247		8	9.41545	5.6472	1.07602		8	9.4667	5.74208	1.23558		8	9.97615	6.01226	1.34643		8	10.0931	6.21425	1.5269		8	10.0101	6.23059	1.5564		8	10.0582	6.63351	1.83121		8	10.1255	6.39112	1.82467
8	6.70311	2.97379	1.42393		8	6.80257	2.55477	1.55278		8	6.85674	2.51064	1.6218		8	6.77245	3.20813	1.305		8	6.78798	3.23175	1.35673		8	6.82294	3.17955	1.34145		8	6.96471	2.88882	1.50345		8	6.77714	3.27385	1.35103
7	11.3639	6.5294	4.97279		7	11.3503	6.55982	4.93564		7	11.2741	6.55136	4.92674		7	11.3272	6.43018	4.99901		7	11.3638	6.44127	5.04688		7	11.3633	6.45866	5.00879		7	11.4339	6.55693	5.12579		7	11.4384	6.36406	5.11137
7	9.26642	4.92611	4.85328		7	9.27085	5.00732	4.80166		7	9.23986	4.9193	4.8971		7	9.20542	4.85899	4.88682		7	9.22437	4.86251	4.92237		7	9.22853	4.83439	4.91666		7	9.25822	4.97809	4.97245		7	9.26258	4.79783	4.95423
6	12.7479	4.96095	3.12387		6	12.4414	5.49398	2.66413		6	12.4681	5.28208	2.80417		6	12.7093	4.85265	3.17967		6	12.8315	4.77934	3.30638		6	12.8067	4.81635	3.27392		6	12.8315	4.9637	3.31236		6	12.9015	4.69125	3.41122
6	12.4189	7.37353	4.93861		6	12.4594	7.36323	4.98335		6	12.3345	7.41401	4.89102		6	12.3746	7.28474	4.94438		6	12.4213	7.26933	4.99807		6	12.3973	7.31157	4.95867		6	12.4941	7.38577	5.10198		6	12.4802	7.21732	5.05258
1	13.1406	7.22413	4.13426		1	13.1919	7.21383	4.18811		1	13.0568	7.2561	4.08925		1	13.0979	7.11926	4.14424		1	13.1696	7.07308	4.22904		1	13.1335	7.13664	4.16916		1	13.2634	7.17305	4.35549		1	13.2417	7.00974	4.29719
6	12.6177	8.38262	5.8665		6	12.6936	8.31482	5.94488		6	12.5386	8.42541	5.80085		6	12.5668	8.31915	5.84252		6	12.5914	8.33789	5.86847		6	12.5846	8.372	5.83333		6	12.6606	8.46287	5.95359		6	12.6317	8.31031	5.88383
1	13.5016	9.01432	5.76258		1	13.6164	8.89565	5.88323		1	13.428	9.04865	5.68674		1	13.4472	8.95297	5.72124		1	13.48	8.96126	5.75495		1	13.4597	9.01147	5.70906		1	13.5568	9.077	5.85674		1	13.511	8.94381	5.7626
6	11.6982	8.5712	6.91947		6	11.746	8.5344	6.99872		6	11.6153	8.64383	6.86341		6	11.6381	8.53798	6.88573		6	11.6336	8.59539	6.86611		6	11.6279	8.59289	6.87599		6	11.655	8.7404	6.93743		6	11.6364	8.58089	6.87945
6	11.9216	9.66792	7.97089		6	12.0121	9.59975	8.07214		6	11.8591	9.75327	7.89735		6	11.8444	9.67918	7.89419		6	11.8105	9.76748	7.84365		6	11.8204	9.75767	7.86183		6	11.8248	9.93342	7.89168		6	11.7884	9.79998	7.80237
6	12.0123	11.0406	7.26261		6	12.1888	10.9807	7.39608		6	11.9797	11.1164	7.17533		6	11.9023	11.026	7.13436		6	11.8929	11.0865	7.03885		6	11.8606	11.0911	7.07687		6	11.9156	11.2383	7.06426		6	11.8228	11.0861	6.94168
1	11.0806	11.268	6.71952		1	11.2757	11.2725	6.85136		1	11.0523	11.358	6.63068		1	10.9629	11.212	6.58859		1	10.9705	11.2543	6.45962		1	10.916	11.2558	6.53261		1	10.9933	11.3997	6.48235		1	10.8858	11.2043	6.37321
1	12.846	11.0797	6.54472		1	13.0256	10.9824	6.68024		1	12.811	11.1261	6.45318		1	12.73	11.0525	6.4088		1	12.7426	11.0887	6.3388		1	12.6823	11.1099	6.34438		1	12.7621	11.2191	6.36033		1	12.6574	11.0762	6.22361
1	12.1753	11.8354	8.00858		1	12.3956	11.7548	8.1541		1	12.1644	11.9197	7.90788		1	12.0536	11.8544	7.84589		1	12.0233	11.9366	7.72798		1	12.0074	11.9377	7.76841		1	12.0535	12.1049	7.73229		1	11.9446	11.9721	7.58669
6	10.7824	9.72335	9.00393		6	10.8605	9.70196	9.08796		6	10.7186	9.84755	8.92648		6	10.709	9.75162	8.93047		6	10.6442	9.87271	8.84225		6	10.6884	9.8431	8.90109		6	10.6529	10.0666	8.88054		6	10.6322	9.92031	8.81101
1	10.688	8.77951	9.56399		1	10.7061	8.75461	9.62875		1	10.6047	8.91359	9.49946		1	10.632	8.82509	9.52138		1	10.551	8.9669	9.4622		1	10.622	8.9283	9.51133		1	10.5501	9.17218	9.5154		1	10.5689	9.03803	9.46763
1	9.81137	9.94318	8.53214		1	9.91036	9.97618	8.60206		1	9.75299	10.075	8.44709		1	9.7323	9.93894	8.45631		1	9.682	10.0442	8.33389		1	9.7082	10.0085	8.42601		1	9.69495	10.2297	8.36141		1	9.66007	10.0435	8.30771
1	10.9875	10.5227	9.73296		1	11.0906	10.4783	9.83526		1	10.9337	10.6543	9.64513		1	10.9029	10.5785	9.63168		1	10.8186	10.723	9.51966		1	10.8748	10.6872	9.58428		1	10.8235	10.9298	9.54358		1	10.7901	10.803	9.45072
6	13.2495	9.38034	8.71228		6	13.3087	9.24076	8.83783		6	13.1779	9.45779	8.65203		6	13.1804	9.45395	8.64178		6	13.1235	9.56255	8.63658		6	13.1597	9.57202	8.61473		6	13.1296	9.75482	8.70455		6	13.114	9.68063	8.59217
1	14.109	9.3707	8.02416		1	14.1772	9.17746	8.16347		1	14.0385	9.40866	7.9664		1	14.0377	9.43429	7.95098		1	14.002	9.52381	7.97402		1	14.0164	9.54149	7.92374		1	14.0143	9.69102	8.0522		1	13.9878	9.62985	7.92421
1	13.2119	8.40642	9.22683		1	13.2058	8.2703	9.3508		1	13.1166	8.4975	9.18989		1	13.1673	8.50141	9.19626		1	13.0922	8.6276	9.21926		1	13.1589	8.63495	9.19568		1	13.0912	8.83793	9.31556		1	13.1165	8.77829	9.22541
1	13.4328	10.16	9.4695		1	13.5302	10.0074	9.59929		1	13.382	10.2506	9.39112		1	13.3511	10.2679	9.36563		1	13.2698	10.3985	9.33982		1	13.3238	10.4072	9.31635		1	13.2754	10.6111	9.38417		1	13.2445	10.5574	9.24792
6	10.6027	7.70368	6.93525		6	10.6225	7.73026	6.96232		6	10.5224	7.78993	6.88462		6	10.5506	7.66667	6.91944		6	10.536	7.72834	6.89778		6	10.5568	7.72123	6.9258		6	10.5612	7.89769	6.95578		6	10.5641	7.71184	6.93342
1	9.84847	7.7986	7.71192		1	9.85576	7.83493	7.728		1	9.76634	7.89861	7.65902		1	9.78587	7.78714	7.68242		1	9.75047	7.87711	7.63357		1	9.79241	7.84915	7.68916		1	9.75964	8.0703	7.6703		1	9.76534	7.87903	7.65247
6	10.4503	6.70473	5.95899		6	10.4207	6.7517	5.94763		6	10.3539	6.76296	5.92374		6	10.409	6.62825	5.97696		6	10.4221	6.66695	5.98578		6	10.4029	6.64687	5.98775		6	10.4279	6.79786	6.04607		6	10.4425	6.59624	6.04446
6	9.28959	5.79351	5.90787		6	9.2761	5.89282	5.87154		6	9.2266	5.85424	5.9036		6	9.24952	5.72682	5.93948		6	9.26006	5.74855	5.95633		6	9.28551	5.75744	5.96416		6	9.29182	5.93242	5.992		6	9.31881	5.71492	6.00944
6	8.26976	5.84155	6.8609		6	8.2177	5.9279	6.81371		6	8.175	5.93806	6.84534		6	8.22328	5.80405	6.89132		6	8.25006	5.82071	6.91617		6	8.23733	5.81524	6.93146		6	8.21726	6.03343	6.92375		6	8.26581	5.77336	6.9668
1	8.34923	6.54465	7.68783		1	8.27454	6.65112	7.62698		1	8.23	6.70462	7.61416		1	8.31811	6.50926	7.71512		1	8.34544	6.52971	7.73622		1	8.33868	6.51292	7.76243		1	8.30512	6.75425	7.73585		1	8.37565	6.45542	7.80948
6	7.1546	4.99896	6.76584		6	7.13339	5.0725	6.72429		6	7.096	5.07008	6.79927		6	7.09591	4.98519	6.80471		6	7.12368	4.98865	6.84042		6	7.11524	5.0127	6.84366		6	7.09451	5.2334	6.83532		6	7.13531	4.98622	6.85949
6	6.04541	5.03926	7.82726		6	5.99161	5.12099	7.75693		6	5.92326	5.1074	7.7906		6	5.99183	5.04384	7.87255		6	6.02828	5.04769	7.91433		6	6.0062	5.07888	7.91215		6	5.9684	5.32171	7.88382		6	6.0228	5.04274	7.92335
6	4.9246	4.0274	7.52914		6	4.89124	4.08728	7.45276		6	4.6161	5.40348	7.01718		6	4.8545	4.04757	7.58294		6	4.89218	4.048	7.63406		6	4.84771	4.11066	7.60633		6	4.8014	4.36741	7.56419		6	4.85207	4.09948	7.58782
1	4.42938	4.23226	6.5667		1	4.42862	4.25691	6.4674		1	4.67058	6.38151	6.51154		1	4.3548	4.25917	6.62426		1	4.3854	4.25687	6.67851		1	4.36052	4.34276	6.64598		1	4.34714	4.58566	6.58462		1	4.37363	4.36301	6.63129
1	4.15788	4.08788	8.31731		1	4.0956	4.15967	8.21152		1	3.7599	5.42594	7.71166		1	4.09408	4.11685	8.3768		1	4.1376	4.11822	8.43302		1	4.08233	4.18717	8.39544		1	4.01534	4.47622	8.32877		1	4.0845	4.1694	8.3751
1	5.30147	2.99243	7.50876		1	5.2794	3.05645	7.47435		1	4.40941	4.63727	6.25385		1	5.21737	3.00766	7.55815		1	5.25732	3.00893	7.61007		1	5.18719	3.06324	7.57145		1	5.12454	3.31475	7.56791		1	5.17541	3.04798	7.53013
6	5.43377	6.46028	7.86198		6	5.3526	6.52983	7.74804		6	6.11106	6.19225	8.86625		6	5.39845	6.47201	7.91076		6	5.43442	6.47609	7.95056		6	5.43363	6.51434	7.97529		6	5.41755	6.76521	7.93648		6	5.47208	6.48507	8.01823
1	4.63506	6.50612	8.62009		1	4.53136	6.58427	8.48249		1	5.25303	6.18131	9.55699		1	4.60336	6.53084	8.67224		1	4.64428	6.53329	8.71674		1	4.63457	6.57666	8.73341		1	4.61151	6.84056	8.68568		1	4.67184	6.53944	8.7753
1	4.9946	6.72526	6.88649		1	4.93732	6.76814	6.75496		1	6.1714	7.20029	8.42611		1	4.95882	6.74303	6.93697		1	4.98811	6.74322	6.97892		1	5.00395	6.81003	7.00389		1	5.0025	7.06489	6.95995		1	5.04964	6.80987	7.05311
1	6.1837	7.22467	8.11829		1	6.08518	7.31082	8.00495		1	7.02243	6.0227	9.46154		1	6.16036	7.22611	8.16236		1	6.19542	7.23273	8.19701		1	6.20721	7.25126	8.24153		1	6.19784	7.49225	8.2102		1	6.25462	7.20443	8.30529
6	6.65672	4.70427	9.20867		6	6.55833	4.82651	9.16599		6	5.80332	3.73524	8.49506		6	6.60288	4.70164	9.25208		6	6.65441	4.71059	9.28855		6	6.59798	4.7037	9.29118		6	6.53732	4.93445	9.2703		6	6.60529	4.62472	9.2941
1	5.87182	4.73308	9.98191		1	5.75235	4.86066	9.91837		1	4.96145	3.74767	9.20698		1	5.82285	4.74015	10.0302		1	5.87999	4.75056	10.0717		1	5.81575	4.74258	10.0682		1	5.747	4.9935	10.038		1	5.82058	4.65728	10.0686
1	7.43885	5.42319	9.49769		1	7.32316	5.5625	9.45901		1	6.72172	3.49872	9.05695		1	7.39602	5.41035	9.5363		1	7.44781	5.42216	9.56461		1	7.4036	5.39229	9.58985		1	7.35539	5.60477	9.57701		1	7.42029	5.29327	9.61237
1	7.10096	3.69571	9.21003		1	7.01805	3.82529	9.20442		1	5.62341	2.91905	7.77831		1	7.03518	3.68777	9.25184		1	7.08768	3.69731	9.28745		1	7.01275	3.6823	9.27711		1	6.92411	3.90265	9.25816		1	7.00377	3.59752	9.25659
6	7.13019	4.15486	5.65227		6	7.15745	4.16914	5.63153		6	7.12533	4.12321	5.75012		6	7.04701	4.14276	5.68589		6	7.07521	4.14406	5.73131		6	7.05329	4.14876	5.718		6	7.06504	4.32518	5.74479		6	7.06849	4.14428	5.71575
1	6.29265	3.47859	5.48327		1	6.3525	3.44872	5.48784		1	6.31327	3.40239	5.63639		1	6.19156	3.49053	5.513		1	6.22161	3.48822	5.56391		1	6.19031	3.50848	5.5423		1	6.21105	3.67079	5.58195		1	6.19143	3.52996	5.51928
6	8.17116	4.13958	4.71115		6	8.19802	4.16155	4.70728		6	8.16594	4.07105	4.82847		6	8.08364	4.10924	4.74394		6	8.11532	4.10358	4.78597		6	8.10448	4.09599	4.79312		6	8.14244	4.22119	4.85739		6	8.11975	4.08045	4.80016
6	7.99251	3.25431	3.50265		6	8.08896	3.17347	3.56391		6	8.03608	3.0579	3.71325		6	7.8599	3.2617	3.5148		6	7.886	3.2577	3.56019		6	7.87786	3.22923	3.57358		6	7.97334	3.22513	3.73015		6	7.87769	3.25431	3.55808
1	8.95662	3.05685	3.02644		1	9.0541	3.08135	3.05813		1	9.00942	2.8611	3.26004		1	8.80943	2.92666	3.09354		1	8.82935	2.90696	3.13845		1	8.82236	2.84888	3.17859		1	8.89441	2.65366	3.577		1	8.81293	2.89314	3.12608
1	7.56517	2.29049	3.82328		1	7.82324	2.18306	3.97129		1	7.66462	2.10912	4.13459		1	7.28342	2.36516	3.79321		1	7.29717	2.3694	3.8365		1	7.26667	2.357	3.85533		1	7.20195	2.50107	4.03329		1	7.27961	2.36766	3.82002
6	7.02064	3.86656	2.4698		6	7.00066	3.54999	2.54075		6	7.04005	3.49559	2.62128		6	7.05687	4.01271	2.43179		6	7.09258	4.02824	2.48019		6	7.12032	3.98698	2.46482		6	7.48236	3.84594	2.40732		6	7.09317	4.04642	2.49004
1	7.44113	4.80834	2.06725		1	7.24336	4.52083	2.06908		1	7.36717	4.45016	2.16899		1	7.59642	4.92961	2.12888		1	7.64845	4.93632	2.17797		1	7.69135	4.88303	2.15647		1	8.28334	4.43564	1.92238		1	7.65459	4.95586	2.20026
1	6.06587	4.11146	2.96265		1	6.03167	3.65942	3.05368		1	6.048	3.66071	3.072		1	6.08254	4.31989	2.84574		1	6.12859	4.35547	2.90305		1	6.15228	4.33323	2.86246		1	6.64997	4.53481	2.62509		1	6.13328	4.37526	2.91999
6	11.1935	3.11244	3.65764		6	11.3227	3.43348	3.54453		6	11.1944	3.26706	3.47688		6	11.0046	3.07524	3.34957		6	11.0289	3.09595	3.13994		6	11.0209	3.11056	3.11552		6	10.9955	3.33116	3.01809		6	11.0122	3.05552	3.09473
6	10.3888	5.31586	2.11983		6	10.0017	5.45804	2.07746		6	10.0245	5.47506	2.23283		6	10.3633	5.56499	2.35245		6	10.4891	5.64953	2.45211		6	10.4367	5.65588	2.46566		6	10.4784	5.93225	2.63948		6	10.5349	5.69173	2.62908
6	7.70712	2.80702	0.443701		6	7.79922	2.48717	0.555552		6	7.90643	2.40694	0.682884		6	7.85292	3.02326	0.413888		6	7.84004	3.07947	0.425692		6	7.89042	3.00241	0.434947		6	7.92619	2.08433	0.853549		6	7.82055	3.13631	0.409724
1	8.02879	3.77696	0.019375		1	7.9589	3.46775	0.068357		1	8.12386	3.38101	0.204346		1	8.26746	3.99013	0.069426		1	8.20673	4.0595	0.063548		1	8.27475	3.97269	0.063404		1	8.70387	2.69794	0.357665		1	8.18677	4.1222	0.06169
1	8.6049	2.29298	0.836772		1	8.77521	2.14425	0.949366		1	8.84643	2.03333	1.13221		1	8.68058	2.43959	0.860002		1	8.70235	2.52508	0.841469		1	8.74043	2.44802	0.875585		1	8.43212	1.3802	1.53968		1	8.68526	2.57252	0.807251
1	7.28187	2.18924	-0.361471		1	7.46078	1.76372	-0.201851		1	7.5883	1.69329	-0.092176		1	7.4723	2.46937	-0.457518		1	7.44476	2.51148	-0.42969		1	7.50809	2.42449	-0.420155		1	7.39923	1.49822	0.084972		1	7.41784	2.58523	-0.453386
										6	12.4957	4.08458	5.82504		6	11.9785	3.74825	5.6571		6	11.8067	3.75319	5.60954		6	11.8324	3.76191	5.58735		6	11.8817	3.8798	5.60208		6	11.6768	3.66114	5.5805
										8	11.7092	3.95594	6.711		8	11.3396	3.9469	6.69974		8	11.0393	2.69168	6.01776		8	11.1213	2.64893	5.97891		8	10.6987	2.51511	6.24768		8	11.9451	3.06983	6.5181
										8	13.617	4.04739	5.41908		8	13.0422	3.1315	5.47892		8	12.783	4.03149	6.29041		8	12.7997	4.05693	6.27714		8	12.7718	3.8889	6.34936
																				1	11.4532	2.34567	6.83579		1	11.5649	2.31493	6.78611		1	10.6709	2.79248	7.17785
																														7	10.1637	0.058984	6.52304
																														6	9.58495	-0.530991	5.2795
																														1	8.73198	0.093558	4.98401
																														1	9.20354	-1.54013	5.51592
																														6	9.14806	0.090772	7.62103
																														1	9.6112	0.577153	8.4897
																														1	8.90057	-0.947569	7.90168
																														6	11.4082	-0.649103	6.948
																														1	12.0979	-0.655262	6.09418
																														1	11.1533	-1.69643	7.18767
																														6	10.5335	-0.583439	4.07678
																														1	11.3087	-1.35898	4.20656
																														1	11.0426	0.384875	3.96113
																														6	12.1559	0.009637	8.1142
																														1	11.5871	-0.067404	9.05772
																														1	12.293	1.07884	7.89083
																														6	7.8845	0.890948	7.28023
																														1	7.24096	0.345876	6.56855
																														1	8.17801	1.84148	6.8102
																														8	9.79464	-0.800338	2.88998
																														8	13.4431	-0.558919	8.24319
																														8	7.17069	1.21612	8.45909
																														1	9.43674	-1.70064	2.90998
																														1	13.3442	-1.45994	8.58504
																														1	6.72388	0.41897	8.78097
																														1	10.447	1.20152	6.31501

## Sheet: Mn-bpy
Structure name	spin multiplicity	Charge			Structure name	spin multiplicity	Charge			Structure name	spin multiplicity	Charge			Structure name	spin multiplicity	Charge			Structure name	spin multiplicity	Charge			Structure name	spin multiplicity	Charge
Mn_l_Br_0_1	1	0			Mn_0_0_2	2	0			MnL•−_0_-1_1	1	-1			IRC_TS-1a''	1	0			TS-1a''	1	0			Mn_l_H_0_1	1	0
Atom number	x	y	z		Atom number	x	y	z		Atom number	x	y	z		Atom number	x	y	z		Atom number	x	y	z		Atom number	x	y	z
35	11.7682	3.55589	4.67674		25	10.5834	5.58134	3.2375		25	10.5431	5.65598	3.23194		7	-0.003942	-5.90633	-1.52828		7	-0.07484	-5.83242	-1.47015		25	10.636	5.50169	3.26803
25	10.656	5.46543	3.28422		8	13.3185	5.39148	2.1163		8	13.2956	5.39088	2.18388		6	0.581397	-7.25176	-1.18134		6	0.525659	-7.1399	-1.10081		8	13.3276	5.42516	2.06488
8	13.2176	5.64704	1.79406		8	9.85837	3.15697	1.69752		8	9.84236	3.18512	1.76458		1	1.22378	-7.10838	-0.304282		1	1.13147	-6.99054	-0.197352		8	9.79045	3.20063	1.62546
8	9.69856	3.36906	1.41249		8	9.53893	7.53063	1.26246		8	9.54746	7.58657	1.25576		1	1.20713	-7.55912	-2.0338		1	1.20273	-7.46642	-1.9137		8	9.49972	7.62047	1.49832
8	9.37765	7.66755	1.78839		7	11.1678	6.8206	4.77244		7	11.1597	6.78568	4.76151		6	1.05851	-4.92573	-1.95934		6	0.956601	-4.85224	-1.90203		7	11.1874	6.80602	4.78825
7	11.2211	6.76015	4.81087		7	9.01832	5.37632	4.56		7	9.04922	5.39448	4.53903		1	0.597804	-3.92978	-1.93897		1	0.510007	-3.84916	-1.83906		7	8.99888	5.4	4.54643
7	9.0401	5.31962	4.58692		6	12.2441	5.46136	2.55874		6	12.2041	5.49528	2.59905		1	1.32682	-5.17523	-2.99767		1	1.21321	-5.0429	-2.96154		6	12.2582	5.47873	2.50869
6	12.2196	5.58811	2.3665		6	12.2918	7.56937	4.80591		6	12.303	7.53673	4.81766		6	-1.09713	-6.03618	-2.5603		6	-1.12201	-6.00418	-2.51139		6	12.3191	7.53206	4.83386
6	12.3596	7.47171	4.85864		1	12.9558	7.49356	3.94321		1	12.9724	7.44994	3.95917		1	-1.91504	-6.59722	-2.09217		1	-1.94206	-6.58898	-2.07571		1	12.9979	7.44009	3.98419
1	13.0485	7.36161	4.01946		6	12.6236	8.39758	5.86612		6	12.6439	8.3552	5.86653		1	-0.682609	-6.63154	-3.38882		1	-0.693984	-6.59104	-3.34784		6	12.6464	8.36581	5.89532
6	12.6801	8.31895	5.91194		1	13.5552	8.96311	5.80768		1	13.5872	8.90249	5.80957		6	-0.433232	-8.3493	-0.839278		6	-0.458774	-8.27529	-0.799152		1	13.5873	8.91674	5.84789
1	13.6274	8.85886	5.87073		6	11.7739	8.49608	6.98903		6	11.7808	8.48265	7.00532		1	-1.00903	-8.65567	-1.72908		1	-1.00016	-8.58998	-1.70818		6	11.779	8.48726	6.99717
6	11.7936	8.47105	6.99352		6	12.1374	9.4059	8.17139		6	12.1695	9.39721	8.17603		1	-1.14778	-7.98664	-0.084339		1	-1.20638	-7.94707	-0.062878		6	12.131	9.40241	8.17936
6	12.1283	9.41681	8.15599		6	12.2597	10.863	7.66458		6	12.3456	10.8461	7.66076		6	-1.67983	-4.72158	-3.09242		6	-1.74131	-4.72473	-3.08511		6	12.2956	10.8512	7.66115
6	12.3727	10.838	7.59434		1	11.3059	11.2143	7.2383		1	11.4045	11.2284	7.23215		1	-0.931056	-4.15425	-3.67178		1	-0.987895	-4.11093	-3.60984		1	11.3617	11.2158	7.2033
1	11.4783	11.217	7.07377		1	13.038	10.9666	6.89262		1	13.1235	10.9129	6.88413		1	-2.00855	-4.08523	-2.25726		1	-2.16728	-4.10703	-2.28259		1	13.0983	10.9316	6.91187
1	13.2169	10.8637	6.88825		1	12.526	11.5296	8.501		1	12.6401	11.5145	8.48719		6	2.30885	-4.88551	-1.07156		6	2.24856	-4.83028	-1.07713		1	12.5499	11.5213	8.49834
1	12.606	11.5295	8.42		6	11.0774	9.36074	9.2862		6	11.1036	9.40437	9.28618		1	2.91501	-5.79849	-1.19831		1	2.83671	-5.75113	-1.23443		6	11.0421	9.3905	9.26694
6	10.9924	9.48797	9.19192		1	10.9617	8.3471	9.70165		1	10.9514	8.40065	9.71414		1	2.01749	-4.82137	-0.012689		1	2.01039	-4.76743	-0.007559		1	10.896	8.3845	9.69122
1	10.7964	8.50864	9.65646		1	10.0923	9.70311	8.93094		1	10.1316	9.76911	8.91705		8	0.249003	-9.44791	-0.269675		8	0.233286	-9.36863	-0.222457		1	10.0736	9.7475	8.88205
1	10.0538	9.85337	8.74551		1	11.3834	10.0247	10.1096		1	11.4222	10.0708	10.1037		8	-2.82161	-5.0138	-3.87047		8	-2.8098	-5.06897	-3.94814		1	11.34	10.0584	10.0902
1	11.2737	10.1858	9.99581		6	13.4927	8.94704	8.76048		6	13.5056	8.90844	8.78545		8	3.0603	-3.72627	-1.36697		8	3.01161	-3.68035	-1.3947		6	13.4614	8.92139	8.80594
6	13.4104	8.90827	8.85781		1	14.3031	8.99834	8.01687		1	14.3194	8.91252	8.04329		1	0.732643	-9.90925	-0.971396		1	0.798907	-9.76418	-0.902702		1	14.2904	8.94993	8.08184
1	14.2678	8.86914	8.16796		1	13.4321	7.91038	9.12978		1	13.4078	7.88188	9.17543		1	-2.52922	-5.40544	-4.70722		1	-2.43675	-5.49493	-4.73435		1	13.3709	7.88946	9.18219
1	13.259	7.89923	9.27414		1	13.7722	9.59527	9.60704		1	13.8101	9.56252	9.61992		1	3.51617	-3.86128	-2.21138		1	3.36676	-3.78786	-2.2899		1	13.7331	9.57137	9.6536
1	13.6754	9.58418	9.68702		6	10.6096	7.72538	6.94138		6	10.6166	7.74044	6.9545		1	-0.44817	-5.51161	-0.650669		1	-0.704784	-5.27566	-0.311649		6	10.6028	7.73276	6.9335
6	10.6159	7.71587	6.93263		1	9.90161	7.74959	7.76662		1	9.90067	7.78224	7.77451		25	-1.49463	-4.40129	1.5268		25	-1.4275	-4.4843	1.3414		1	9.88015	7.7766	7.7448
1	9.8847	7.77715	7.73513		6	10.3258	6.90794	5.83506		6	10.3029	6.90345	5.8468		8	-1.81091	-2.18943	-0.410696		8	-1.73096	-2.24191	-0.55167		6	10.3292	6.91161	5.82893
6	10.3544	6.87431	5.84252		6	9.10726	6.09239	5.71585		6	9.11665	6.12012	5.72343		8	-3.57255	-5.8883	0.037704		8	-3.6018	-5.93584	-0.024084		6	9.0972	6.10845	5.69958
6	9.12783	6.0552	5.72272		6	8.10169	6.04818	6.68908		6	8.07767	6.05548	6.68894		8	-3.21907	-3.29226	3.63272		8	-3.05887	-3.30533	3.50516		6	8.09469	6.06786	6.67451
6	8.12114	6.0249	6.69147		1	8.2232	6.6385	7.59645		1	8.19223	6.64636	7.59925		7	0.386951	-3.85535	1.96493		7	0.449988	-3.90606	1.87655		1	8.2235	6.64761	7.58738
1	8.23195	6.63322	7.58787		6	6.95235	5.26603	6.51258		6	6.94598	5.27919	6.50665		7	-0.771469	-6.08147	2.36133		7	-0.727041	-6.14845	2.28335		6	6.93738	5.29496	6.49521
6	6.97658	5.22762	6.52461		6	5.85877	5.22628	7.59112		6	5.83424	5.2247	7.5718		6	-1.6884	-3.06264	0.363133		6	-1.61992	-3.12875	0.204038		6	5.85063	5.25084	7.58032
6	5.87247	5.21271	7.59184		6	4.69332	4.30174	7.19493		6	4.68078	4.2934	7.1534		6	0.950654	-2.62719	1.7552		6	1.00153	-2.68274	1.67033		6	4.67812	4.33613	7.18239
6	4.72305	4.26014	7.21639		1	4.20019	4.63826	6.26925		1	4.20123	4.63016	6.22053		1	0.312556	-1.88314	1.27514		1	0.375538	-1.94833	1.1612		1	4.18024	4.68496	6.26385
1	4.23531	4.55636	6.27434		1	3.93707	4.30277	7.99548		1	3.90906	4.2817	7.93992		6	2.24361	-2.30268	2.09198		6	2.28724	-2.34762	2.04735		1	3.92758	4.33205	7.98819
1	3.95832	4.28069	8.0084		1	5.02512	3.26127	7.05049		1	5.02302	3.2565	7.00635		1	2.59771	-1.29501	1.86535		1	2.64364	-1.34067	1.8225		1	5.00418	3.29579	7.02453
1	5.06954	3.21954	7.1134		6	5.30361	6.65556	7.80202		6	5.25622	6.64331	7.79052		6	3.09906	-3.2629	2.71383		6	3.11906	-3.29407	2.6959		6	5.30497	6.68076	7.80921
6	5.30109	6.64382	7.73805		1	4.51942	6.6415	8.57644		1	4.46246	6.62159	8.55648		6	4.55437	-2.90798	3.04854		6	4.56569	-2.93942	3.06727		1	4.52593	6.66244	8.58861
1	4.50548	6.65191	8.50064		1	4.85957	7.04849	6.87303		1	4.81982	7.03969	6.8589		6	4.58084	-1.73005	4.05138		6	4.56402	-1.75418	4.06136		1	4.85672	7.08539	6.88731
1	4.86735	6.99511	6.78785		1	6.08625	7.35689	8.13044		1	6.03007	7.34985	8.12918		1	4.08822	-2.00711	4.99791		1	4.04549	-2.02351	4.99604		1	6.09315	7.3748	8.13977
1	6.07246	7.36497	8.04981		6	6.47071	4.70927	8.91501		6	6.41868	4.70398	8.90637		1	4.07011	-0.840507	3.6504		1	4.06706	-0.866604	3.63952		6	6.47008	4.71668	8.89386
6	6.47396	4.75295	8.94106		1	5.69664	4.68166	9.69919		1	5.63423	4.6652	9.68118		1	5.62164	-1.44523	4.2792		1	5.59904	-1.47124	4.31475		1	5.70126	4.68287	9.68281
1	5.68911	4.74567	9.71458		1	7.28673	5.35633	9.27272		1	7.22579	5.35419	9.27888		6	5.31028	-4.09579	3.67033		6	5.30244	-4.12423	3.71685		1	7.2907	5.3569	9.25329
1	7.27724	5.42229	9.28614		1	6.87102	3.68953	8.79448		1	6.83012	3.68807	8.78758		1	5.35133	-4.95808	2.98557		1	5.36064	-4.99151	3.0398		1	6.86585	3.69701	8.7588
1	6.88659	3.73399	8.86375		6	6.88066	4.54555	5.30614		6	6.89188	4.55349	5.27506		1	4.84634	-4.42893	4.61242		1	4.81481	-4.44875	4.64985		6	6.85519	4.58888	5.28549
6	6.91787	4.47702	5.3417		1	6.02893	3.90924	5.06809		1	6.04489	3.91399	5.02632		1	6.34695	-3.79922	3.89629		1	6.33293	-3.82593	3.9663		1	5.99643	3.96428	5.04174
1	6.07515	3.82487	5.11523		6	7.91217	4.6287	4.37797		6	7.91948	4.64524	4.3635		6	5.28288	-2.48817	1.74842		6	5.32351	-2.53115	1.78028		6	7.89007	4.66954	4.35581
6	7.95473	4.55383	4.41345		6	10.145	4.10654	2.30645		6	10.1197	4.16439	2.34634		1	4.83812	-1.58353	1.30452		1	4.89172	-1.62851	1.32023		6	10.1096	4.12699	2.24471
6	10.063	4.18901	2.13487		6	9.94754	6.77126	2.04239		6	9.93297	6.82702	2.06231		1	5.23595	-3.28864	0.992175		1	5.29238	-3.33754	1.0296		6	9.92899	6.81547	2.21023
6	9.87852	6.80478	2.3674		1	7.85023	4.06351	3.4464		1	7.86069	4.08252	3.42933		1	6.34368	-2.27126	1.95722		1	6.37915	-2.31604	2.01385		1	7.82096	4.11207	3.4199
1	7.90177	3.96824	3.49388												6	2.52523	-4.49834	2.96258		6	2.5397	-4.5356	2.94034		1	11.2594	4.3395	4.19682
															1	3.10203	-5.28606	3.44487		1	3.10506	-5.31544	3.44675
															6	1.1849	-4.78761	2.59759		6	1.21944	-4.82252	2.53437
															6	0.5322	-6.04842	2.81558		6	0.555248	-6.09909	2.75737
															6	1.13138	-7.17875	3.4205		6	1.15047	-7.20108	3.39604
															1	2.17197	-7.09846	3.73738		1	2.18417	-7.1115	3.72955
															6	0.439512	-8.36834	3.60311		6	0.454129	-8.39438	3.59405
															6	1.12811	-9.61081	4.19507		6	1.14251	-9.61887	4.21848
															6	0.13679	-10.7706	4.40684		6	0.158189	-10.7833	4.43347
															1	-0.68156	-10.4903	5.08952		1	-0.671943	-10.5004	5.10054
															1	0.663186	-11.631	4.85008		1	0.686788	-11.6312	4.89714
															1	-0.309562	-11.1081	3.45808		1	-0.270565	-11.1396	3.48348
															6	1.77166	-9.26716	5.55761		6	1.76239	-9.24286	5.58329
															1	2.27783	-10.1541	5.97382		1	2.26849	-10.1188	6.02121
															1	1.00916	-8.93912	6.28303		1	0.986478	-8.90871	6.29131
															1	2.52298	-8.46717	5.46869		1	2.50961	-8.43945	5.49134
															6	2.22674	-10.0808	3.21046		6	2.25831	-10.0901	3.25354
															1	2.7068	-11.0027	3.57949		1	2.73838	-11.0036	3.64178
															1	3.01079	-9.31677	3.08678		1	3.03918	-9.3227	3.13161
															1	1.7976	-10.2871	2.2167		1	1.84383	-10.312	2.25703
															6	-0.916028	-8.36256	3.167		6	-0.884622	-8.40128	3.14398
															1	-1.55506	-9.23816	3.27901		1	-1.52502	-9.2743	3.2667
															6	-1.45766	-7.23871	2.58028		6	-1.41918	-7.28865	2.51477
															6	-2.74659	-5.29754	0.629205		6	-2.74704	-5.35411	0.527097
															6	-2.4968	-3.73964	2.82606		6	-2.36192	-3.78029	2.69814
															1	-2.49768	-7.24708	2.2483		1	-2.45249	-7.30776	2.16359

## Sheet: molecules
Structure name	spin multiplicity	Charge			Structure name	spin multiplicity	Charge			Structure name	spin multiplicity	Charge			Structure name	spin multiplicity	Charge			Structure name	spin multiplicity	Charge			Structure name	spin multiplicity	Charge			Structure name	spin multiplicity	Charge
TEOA	1	0			TEOAH	1	1			HCOO	1	-1			CO2	1	0			CO	1	0			H2O	1	0			H2	1	0
Atom number	x	y	z		Atom number	x	y	z		Atom number	x	y	z		Atom number	x	y	z		Atom number	x	y	z		Atom number	x	y	z		Atom number	x	y	z
7	10.3824	7.22101	0.004111		7	10.2099	7.22154	-0.001107		6	1.49211	7.74907	-3.91856		6	9.85684	10.4781	1.40976		6	9.79279	10.4781	1.40976		8	2.64357	9.43901	-0.032881		1	9.51852	7.32962	0
6	10.7529	7.82385	1.28165		6	10.6537	7.86007	1.29443		1	2.06443	6.75244	-3.91855		8	8.6936	10.4781	1.40976		8	8.66249	10.4781	1.40976		1	3.61062	9.4992	-0.032881		1	8.75694	7.32962	0
1	10.7835	8.91876	1.17023		1	10.573	8.94774	1.17789		8	2.20718	8.77409	-3.91855		8	11.0201	10.4781	1.40976							1	2.37747	10.3707	-0.032881
1	11.7741	7.51503	1.60332		1	11.7141	7.60109	1.42915		8	0.246169	7.64888	-3.91855
6	10.7566	8.02432	-1.15705		6	10.6494	8.02541	-1.20186
1	10.7863	7.3789	-2.04852		1	10.5523	7.38307	-2.08592
1	11.7789	8.45413	-1.04973		1	11.7148	8.25593	-1.05402
6	10.7555	5.81386	-0.112373		6	10.6694	5.78483	-0.100205
1	10.783	5.36149	0.891047		1	10.614	5.34493	0.903209
1	11.7788	5.69191	-0.53603		1	11.7244	5.81114	-0.410368
6	9.75883	7.50616	2.4028		6	9.80989	7.43927	2.50266
1	9.65122	6.41041	2.52463		1	9.87423	6.35068	2.67965
1	8.76722	7.89753	2.12157		1	8.75132	7.68057	2.30558
6	9.7655	5.00324	-0.954254		6	9.82359	4.92861	-1.04957
1	9.65874	5.45149	-1.96157		1	9.87325	5.30689	-2.08635
1	8.77266	5.04598	-0.476723		1	8.76776	4.97117	-0.732079
6	9.76464	9.1549	-1.44635		6	9.82699	9.29678	-1.43887
1	9.66976	9.82033	-0.565922		1	9.91973	10.0031	-0.594758
1	8.76934	8.71656	-1.62762		1	8.76062	9.02913	-1.53121
8	10.1187	8.12776	3.62382		8	10.2039	8.17892	3.63457
8	10.1287	3.63632	-1.03362		8	10.2338	3.58399	-0.961485
8	10.1142	9.88385	-2.60956		8	10.2182	9.88421	-2.65837
1	10.9487	7.73131	3.92721		1	11.0463	7.82285	3.95478
1	10.9575	3.57621	-1.53145		1	11.0696	3.48592	-1.44219
1	10.9443	10.3501	-2.43173		1	11.072	10.3237	-2.52726
					1	9.17813	7.21479	0.004239
